1 **Intragenic Recombination Influences Rotavirus Diversity and Evolution**

2

3 Irene Hoxie<sup>a,b</sup> and John J. Dennehy<sup>a,b,#</sup>

4

5 <sup>a</sup>Biology Department, Queens College of The City University of New York, Queens, NY

6 <sup>b</sup>The Graduate Center of The City University of New York, New York, NY

7

8

9

10 Running head: Rotavirus Recombination and Evolution

11

12 #Address correspondence to John J. Dennehy, john.dennehy@qc.cuny.edu

13

14

15

16 **Abstract**

17 Because of their replication mode and segmented dsRNA genome, homologous recombination is assumed to be  
18 rare in the rotaviruses. We analyzed 23,627 complete rotavirus genome sequences available in the NCBI Virus  
19 Variation database, and found 109 instances of homologous recombination, at least 11 of which prevailed across  
20 multiple sequenced isolates. In one case, recombination may have generated a novel rotavirus VP1 lineage. We  
21 also found strong evidence for intergenotypic recombination in which more than one sequence strongly  
22 supported the same event, particularly between different genotypes of segment 9, which encodes the serotype  
23 protein, VP7. The recombined regions of many putative recombinants showed amino acid substitutions  
24 differentiating them from their major and minor parents. This finding suggests that these recombination events  
25 were not overly deleterious, since presumably these recombinants proliferated long enough to acquire adaptive  
26 mutations in their recombined regions. Protein structural predictions indicated that, despite the sometimes  
27 substantial amino acid replacements resulting from recombination, the overall protein structures remained  
28 relatively unaffected. Notably, recombination junctions appear to occur non-randomly with hot spots  
29 corresponding to secondary RNA structures, a pattern seen consistently across segments. In total, we found  
30 strong evidence for recombination in nine of eleven rotavirus A segments. Only segment 7 (NSP3) and segment  
31 11 (NSP5) did not show strong evidence of recombination. Collectively, the results of our computational  
32 analyses suggest that, contrary to the prevailing sentiment, recombination may be a significant driver of  
33 rotavirus evolution and may influence circulating strain diversity.

34  
35 *Keywords:* dsRNA, genetic diversity, *Reoviridae*, segmented genome, RDP4

## 36 **Introduction**

37           The non-enveloped, dsRNA rotaviruses of the family *Reoviridae* are a common cause of acute  
38 gastroenteritis in young individuals of many bird and mammal species (Desselberger 2014). The rotavirus  
39 genome consists of 11 segments, each coding for a single protein with the exception of segment 11, which  
40 encodes two proteins, NSP5 and NSP6 (Desselberger 2014). Six of the proteins are structural proteins (VP1-4,  
41 VP6 and VP7), and the remainder are non-structural proteins (NSP1-6). The infectious virion is a triple-layered  
42 particle consisting of two outer-layer proteins, VP4 and VP7, a middle layer protein, VP6, and an inner capsid  
43 protein, VP2. The RNA polymerase (VP1) and the capping-enzyme (VP3) are attached to the inner capsid  
44 protein. For the virus to be infectious (at least when not infecting as an extracellular vesicle), the VP4 spike  
45 protein must be cleaved by a protease, which results in the proteins VP5\* and VP8\* (Arias, Romero et al. 1996).  
46 Because they comprise the outer layer of the virion, VP7 and VP4 are capable of eliciting neutralizing  
47 antibodies, and are used to define G (glycoprotein) and P (protease sensitive) serotypes respectively  
48 (Matthijnssens, Ciarlet et al. 2008, Nair, Feng et al. 2017). Consequently, VP7 and VP4 are likely to be under  
49 strong selection for diversification to mediate cell entry or escape host immune responses (McDonald,  
50 Matthijnssens et al. 2009, Kirkwood 2010, Patton 2012).

51           Based on sequence identity and antigenic properties of VP6, 10 different rotavirus groups (A–J) have  
52 been identified, with group A rotaviruses being the most common cause of human infections (Matthijnssens,  
53 Otto et al. 2012, Mihalov-Kovacs, Gellert et al. 2015, Banyai, Kemenesi et al. 2017). A genome classification  
54 system based on established nucleotide percent cutoff values has been developed for group A rotaviruses  
55 (Matthijnssens, Ciarlet et al. 2008, Matthijnssens, Ciarlet et al. 2011). In the classification system, the segments  
56 VP7-VP4-VP6-VP1-VP2-VP3-NSP1-NSP2-NSP3-NSP4-NSP5/6 are represented by the indicators G<sub>x</sub>-P<sub>[x]</sub>-I<sub>x</sub>-  
57 R<sub>x</sub>-C<sub>x</sub>-M<sub>x</sub>-A<sub>x</sub>-N<sub>x</sub>-T<sub>x</sub>-E<sub>x</sub>-H<sub>x</sub>, (x = Arabic numbers starting from 1), respectively (Matthijnssens, Ciarlet et al.  
58 2008, Matthijnssens, Ciarlet et al. 2011). To date, between 20 to 51 different genotypes have been identified for  
59 each segment, including 51 different VP4 genotypes (P[1]–P[51]) and 36 different VP7 genotypes (G1–G36),  
60 both at 80% nucleotide identity cutoff values (Steger, Boudreaux et al. 2019).

61           The propensity of rotavirus for coinfection and outcrossing with other rotavirus strains makes it a  
62 difficult pathogen to control and surveil, even with current vaccines (Rahman, Matthijnssens et al. 2007,  
63 Matthijnssens, Ciarlet et al. 2008, Matthijnssens, Bilcke et al. 2009, Kirkwood 2010, Ghosh and Kobayashi  
64 2011, Sadiq, Bostan et al. 2018). Understanding rotaviral diversity expansion, genetic exchange between strains  
65 (especially between the clinically significant type I and type II genogroups), and evolutionary dynamics  
66 resulting from coinfections have important implications for disease control (Rahman, Matthijnssens et al. 2007,  
67 Matthijnssens, Ciarlet et al. 2008, Matthijnssens, Bilcke et al. 2009, Kirkwood 2010, Ghosh and Kobayashi  
68 2011, Sadiq, Bostan et al. 2018). Rotavirus A genomes have high mutation rates (Matthijnssens, Heylen et al.  
69 2010, Donker and Kirkwood 2012, Sadiq, Bostan et al. 2018), undergo frequent reassortment (Ramig and Ward  
70 1991, Ramig 1997, Ghosh and Kobayashi 2011, McDonald, Nelson et al. 2016), and the perception is that these  
71 two processes are the primary drivers of rotavirus evolution (Doro, Farkas et al. 2015, Sadiq, Bostan et al.

72 2018). Genome rearrangements may also contribute to rotavirus diversity, but are not believed to be a major  
73 factor in rotavirus evolution (Desselberger 1996). Homologous recombination, however, is thought to be  
74 especially rare in rotaviruses due to their dsRNA genomes (Ramig 1997, McDonald, Nelson et al. 2016,  
75 Varsani, Lefeuvre et al. 2018). Unlike +ssRNA (Lukashev 2005) viruses and DNA viruses (Pérez-Losada,  
76 Arenas et al. 2015), dsRNA viruses cannot easily undergo intragenic recombination because their genomes are  
77 not replicated in the cytoplasm by host polymerases, but rather within nucleocapsids by viral RNA-dependent  
78 RNA polymerase (Ramig 1997, Patton, Vasquez-Del Carpio et al. 2007). Genome encapsidation should  
79 significantly reduce the opportunities for template switching, the presumptive main mechanism of  
80 intramolecular recombination (Lai 1992, Pérez-Losada, Arenas et al. 2015).

81 Despite the expectation that recombination should be rare in rotavirus A, there are nevertheless  
82 numerous reports of recombination among rotaviruses in the literature (Suzuki, Gojobori et al. 1998, Parra, Bok  
83 et al. 2004, Phan, Okitsu et al. 2007, Phan, Okitsu et al. 2007, Cao, Barro et al. 2008, Martinez-Laso, Roman et  
84 al. 2009, Donker, Boniface et al. 2011, Jere, Mlera et al. 2011, Esona, Roy et al. 2017, Jing, Zhang et al. 2018).  
85 However, a comprehensive survey of 797 rotavirus A genomes failed to find any instances of the same  
86 recombination event in multiple samples (Woods 2015). There are two possible explanations for this outcome.  
87 Either the putative recombinants were spurious results stemming from poor analytical technique or were poorly  
88 fit recombinants that failed to increase in frequency in the population such that they would be resampled  
89 (Woods 2015). The main implications of this study are that recombination among rotavirus A is rare, usually  
90 disadvantageous, and not a significant factor in rotavirus evolution.

91 Since the number of publicly available rotavirus A whole segment genomes is now over 23,600, it is  
92 worth revisiting these conclusions to see if they are still valid. To this end, we used bioinformatics tools to  
93 identify possible instances of recombination among all available complete rotavirus A genome sequences  
94 available in the NCBI Virus Variation database as of May, 2019. We found strong evidence for recombination  
95 events among all rotavirus A segments with the exception of NSP3 and NSP5. In several cases, the  
96 recombinants were fixed in the population such that several hundred sampled strains showed remnants of this  
97 same event. These reports suggest that rotavirus recombination occurs more frequently than is generally  
98 appreciated, and can significantly influence rotavirus A evolution.

## 99 **Methods**

### 100 *Sequence Acquisition and Metadata Curation*

101 We downloaded all complete rotavirus genomes from NCBI's Virus Variation Resource as of May 2019  
102 (n = 23,627) (Hatcher, Zhdanov et al. 2017). Laboratory strains were removed from the dataset. Genomes that  
103 appeared to contain substantial insertions were excluded as well. Avian and mammalian strains were analyzed  
104 separately as recombination analyses between more divergent genomes can sometimes confound the results. No  
105 well-supported events were identified among the avian strains. For each rotavirus genome, separate fasta files  
106 were downloaded for each of the 11 segments. Metadata including host, country of isolation, collection date, and  
107 genotype (genotype cutoff values as defined by (Matthijnssens, Ciarlet et al. 2008)) were recorded. The

108 genotype cutoff values allowed for the differentiation of events that occurred between two different genotypes—  
109 intergenotypic—from those which occurred between the same genotype—intragenotypic.

#### 110 *Recombination Detection and Phylogenetic Analysis*

111 All 11 segments of each complete genome were separately aligned using MUSCLE v3.8.31 (Edgar  
112 2004) after removing any low quality sequence (e.g., ‘Ns’). Putative recombinants were identified using RDP4  
113 Beta 4.97, a program, which employs multiple recombination detection methods to minimize the possibility of  
114 false positives (Martin, Murrell et al. 2015). All genomes were analyzed, with a p-value cut off < 10E-4, using  
115 3Seq, Chimæra, SiScan, MaxChi, Bootscan, Geneconv, and RDP as implemented in RDP4 (Martin, Murrell et  
116 al. 2015). We eliminated any strains that did not show a putative recombination event predicted by at least 6 of  
117 the above listed programs. We then ran separate phylogenetic analyses on the ‘major parent’ and ‘minor parent’  
118 sequences of putative recombinants in BEAST v1.10.4 using the general time reversible (GTR) +  $\Gamma$  + I  
119 substitution model (Suchard, Lemey et al. 2018). ‘Parent’ in this case does not refer to the actual progenitors of  
120 the recombinant strain, but rather those members of the populations whose genome sequences most closely  
121 resemble that of the recombinant. Significant phylogenetic incongruities with high posterior probabilities  
122 between the ‘major parent’ and ‘minor parent’ sequences were interpreted as convincing evidence for  
123 recombination.

#### 124 *Phylogenetic Analysis of VP1 and VP3*

125 Segment 1 (VP1) and segment 3 (VP3) each showed evidence for recombination events resulting in a  
126 novel lineage, wherein many isolates reflected the same recombination event. To analyze these events more  
127 thoroughly, we split alignments of a subset of environmental isolates to include flagged clades, minor parent  
128 clades, and major parent clades along with outgroup clades to improve accuracy of tip dating. We generated  
129 minor and major parent phylogenies using BEAST v1.10.4 (Suchard, Lemey et al. 2018). We used tip dating to  
130 calibrate molecular clocks and generate time-scaled phylogenies. The analyses were run under an uncorrelated  
131 relaxed clock model using a time-aware Gaussian Markov random field Bayesian skyride tree prior (Minin,  
132 Bloomquist et al. 2008). The alignments were run using a GTR +  $\Gamma$  + I substitution model and partitioned by  
133 codon position. Log files in Tracer v1.7.1 (Rambaut, Drummond et al. 2018) were analyzed to confirm  
134 sufficient effective sample size (ESS) values, and trees were annotated using a 20% burn in. The alignments  
135 were run for three chains with a 200,000,000 Markov chain Monte Carlo (MCMC) chain length, analyzed on  
136 Tracer v1.7.1 (Rambaut, Drummond et al. 2018), and combined using LogCombiner v1.10.4 (Drummond and  
137 Rambaut 2007). Trees were annotated with a 10% burn, and run in TreeAnnotator v1.10.4 (Suchard, Lemey et  
138 al. 2018). The best tree was visualized using FigTree v1.4.4 (Rambaut 2019) with the nodes labeled with  
139 posterior probabilities.

#### 140 *RNA Secondary Structure Analysis*

141 To test the hypothesis that recombination junctions were associated with RNA secondary structure, we  
142 generated consensus secondary RNA structures of different segments and genotypes using RNAalifold in the

143 ViennaRNA package, version 2.4.11 (Bernhart, Hofacker et al. 2008, Lorenz, Bernhart et al. 2011). The  
144 consensus structures were visualized and mountain plots were generated to identify conserved structures that  
145 may correspond to breakpoint locations. We made separate consensus alignments in two ways, by using the  
146 same genotype and by combining genotypes. Due to the high sequence variability of the observed recombinants,  
147 particularly in segments 4 (VP4) and 9 (VP7), we note that the consensus structures may vary substantially  
148 depending on the sequences used in the alignments. Segments 7 (NSP3), 10 (NSP4), and 11 (NSP5) were not  
149 analyzed due to only having one or no recombination events. Consensus structures could not reliably be made  
150 for segment 2 (VP2). While the VP2 protein is relatively conserved across genotypes, it contains insertions  
151 particularly in the C1 genotype, yet shows recombination across C1 and C2 genotypes.

#### 152 *Protein Structure and Antigenic Epitope Predictions*

153 To evaluate whether recombination events resulted in substantial (deleterious) protein structure changes,  
154 we employed LOMETS2 (Local Meta-Threading-Server) I-TASSER (Iterative Threading Assembly  
155 Refinement) (Zhang 2008, Roy, Kucukural et al. 2010, Yang and Zhang 2015) to predict secondary and tertiary  
156 protein structures. I-TASSER generates a confidence (C) score for estimating the quality of the protein models.  
157 To determine if any of the putative recombinants possessed recombined regions containing epitopes, we  
158 analyzed the amino acid sequences of all VP4, VP6, and VP7 recombinants and their major and minor parents.  
159 We used the Immune Epitope Database (IEDB) (Vita, Mahajan et al. 2019) and SVMTriP (Yao, Zhang et al.  
160 2012) to predict conserved epitopes.

## 161 **Results**

### 162 *Strong Evidence for Homologous Recombination in Rotavirus A*

163 We identified 109 putative recombination events (identified by 6/7 RDP4 programs; Table 1,  
164 Supplementary Table 1). Of these, 67 recombination events were strongly supported, meaning they were  
165 detected by 7/7 RDP4 programs with a p-value cut off  $< 10E-9$  (Table 1). Most recombination events detected  
166 were observed in sequences uploaded to the Virus Variation database since the last large scale analysis (Woods  
167 2015) so differences between these results and prior studies may simply reflect the recent increase in available  
168 genome sequences.

### 169 *Putative Recombination Events Observed in Multiple Environmental Isolates*

170 Eleven of the recombination events identified in Table 1 were observed in more than one environmental  
171 isolate (Fig. 1; Table 2). The observation of multiple sequenced strains with the same recombination event is  
172 strong evidence that the observed event was not spurious, and was not a consequence of improper analytical  
173 technique or experimental error. Assuming the events are not spurious, there are only two ways that multiple  
174 sequenced isolates will show the same recombinant genotype. Either multiple recombination events with the  
175 same exact breakpoints occurred at approximately the same time, or the event happened once and descendants  
176 of the recombined genotype were subsequently isolated from additional infected hosts. The latter scenario is  
177 more parsimonious, and suggests that the new genotype was not reproductively impaired. Indeed, some

178 recombined genotypes may be more fit than their predecessors, but this outcome would need to be  
 179 experimentally validated with infectivity assays.

180

181 **Table 1.** *Recombination events identified among all mammalian rotavirus A genome sequences downloaded*  
 182 *from NCBI Virus Variation database in May 2019 (Hatcher, Zhdanov et al. 2017). <sup>a</sup>6/7 programs implemented*  
 183 *in RDP4 identified putative recombination event (see Methods). <sup>b</sup>Events identified by 7/7 programs implemented*  
 184 *in RDP4 or events where more than one environmental isolate showed the same event (see Methods). <sup>c</sup>Strongly*  
 185 *supported events (Row 3) divided by number of sequences analyzed (Row 1). <sup>d</sup>Number of intergenotypic events*  
 186 *out of all putative recombination events (Row 2).*

|                                                       | VP1    | VP2    | VP3    | VP4    | VP6    | VP7    | NSP1   | NSP2   | NSP3 | NSP4   | NSP5   |
|-------------------------------------------------------|--------|--------|--------|--------|--------|--------|--------|--------|------|--------|--------|
| <b>Number of sequences analyzed</b>                   | 1710   | 1600   | 1905   | 1990   | 2176   | 3887   | 1962   | 2186   | 1881 | 2430   | 1900   |
| <b>Putative recombination events<sup>a</sup></b>      | 15     | 13     | 16     | 11     | 11     | 24     | 11     | 4      | 0    | 3      | 1      |
| <b>Strongly supported events<sup>b</sup></b>          | 7      | 8      | 15     | 7      | 6      | 14     | 7      | 1      | 0    | 1      | 1      |
| <b>Recombination frequency<sup>c</sup></b>            | 4.1E-3 | 5.0E-3 | 7.9E-3 | 3.5E-3 | 2.8E-3 | 3.6E-3 | 3.6E-3 | 4.6E-4 | --   | 4.1E-4 | 5.3E-4 |
| <b>Intergenotypic recombination ratio<sup>d</sup></b> | 2/15   | 8/13   | 4/16   | 6/11   | 7/11   | 22/24  | 3/11   | 2/4    | --   | 2/3    | 1/1    |

187



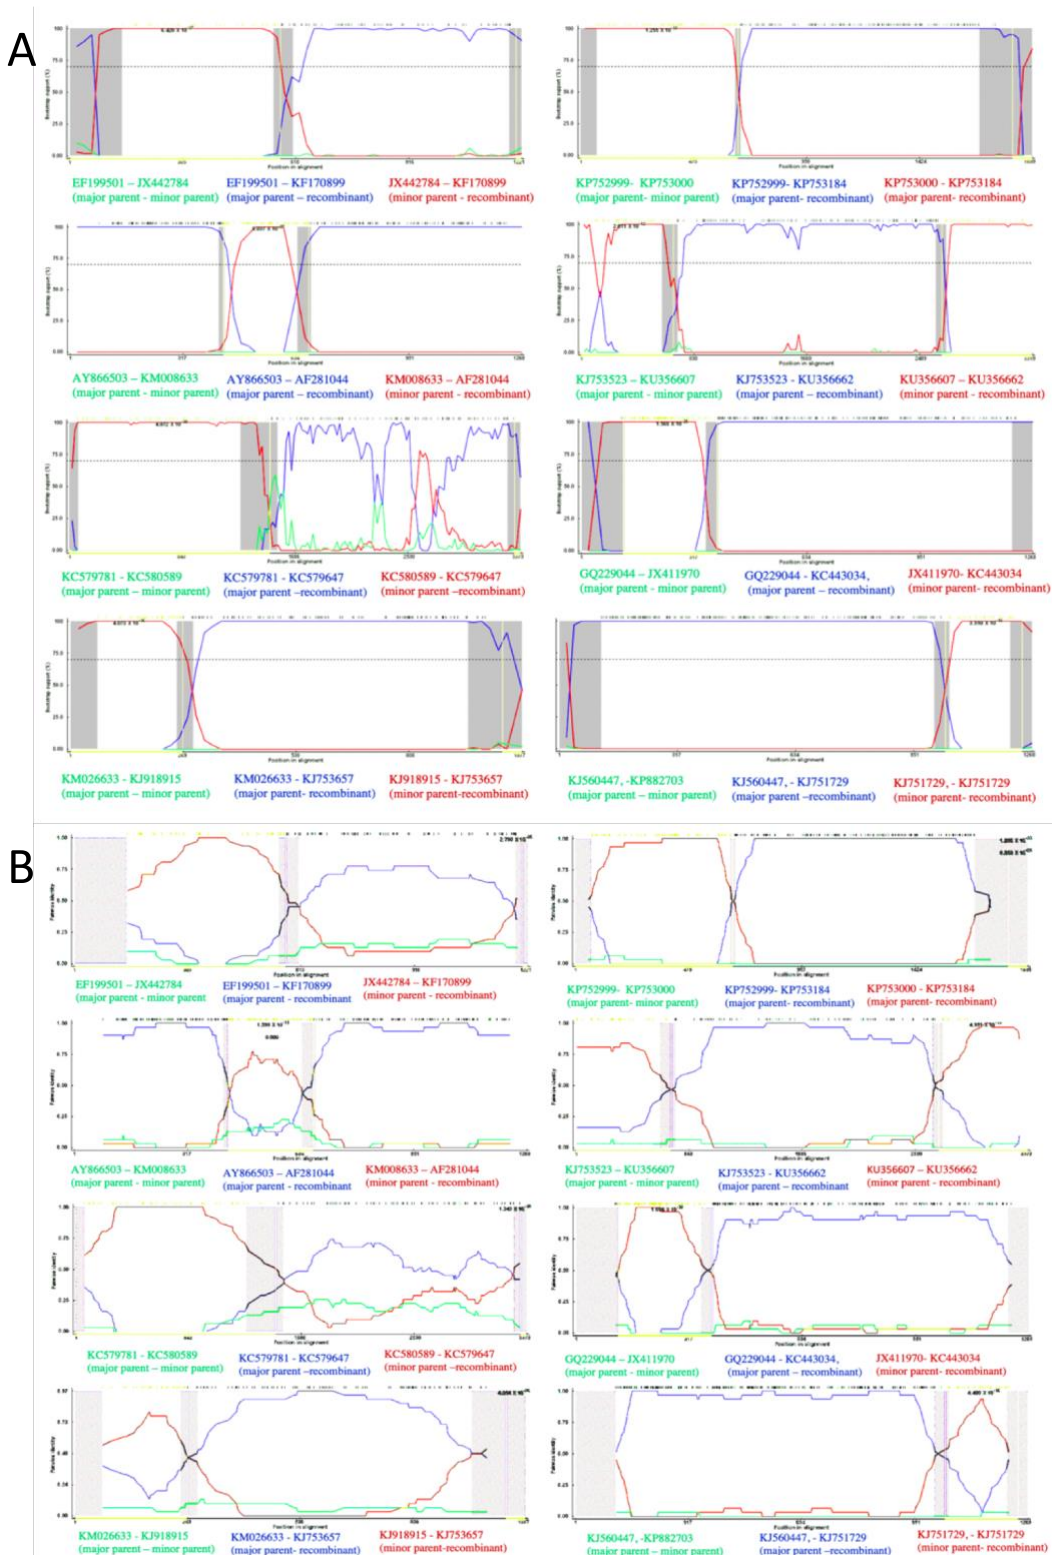

188

189 **Figure 1.** Bootscan (A) and RDP (B) analyses of putative recombinants where multiple environmental samples  
 190 supported the event. From top left to bottom left: a G6-G6 event in VP7, a G9-G1 event, an R1-R1 event in VP1,  
 191 and an N1-N1 event in NSP2. From top right to bottom right: an A8-A8 event in NSP1, an R2-R2 event in VP1,  
 192 a G2-G1 event in VP7, and a G3-G1 event.  
 193



194 **Table 2.** Recombination events observed in multiple independent environmental isolates (i.e., isolates from  
195 different patients and/or sequenced by different laboratories). <sup>a</sup>99% confidence intervals. <sup>b</sup>See Fig. 2.

| Recombined Segment | Genotype(s) Involved | Number of Independent Isolates | Corrected and Uncorrected Multiple Comparisons | Breakpoints <sup>a</sup>               | Accession Numbers                                        |
|--------------------|----------------------|--------------------------------|------------------------------------------------|----------------------------------------|----------------------------------------------------------|
| Segment 1 (VP1)    | R1                   | 2                              | 4.787E-18 and 1.349E-10                        | 35 – 1448 (1290–1498)                  | KC579647<br>KC580176                                     |
| Segment 1 (VP1)    | R2                   | Flagged in 285 samples.        | 1.305E-16 and 3.332E-09                        | (541-711) – (1327–1445)                | KU199270 <sup>b</sup>                                    |
| Segment 1 (VP1)    | R2                   | 2                              | 1.756E-20 and 4.951E-13                        | 656 (541–711) – 2661 (2600–2735)       | KU356662<br>KU356640                                     |
| Segment 3 (VP3)    | M2                   | Flagged in 551 samples.        | 1.78E-12 and 4.982E-05                         | 1258 (872–1389) – 1798 (1662–1917)     | KX655453                                                 |
| Segment 3 (VP3)    | M1                   | Flagged in 107 samples.        | 2.491E-20 and 6.946E-13                        | 2158 (2129–2174) – 2531 (undetermined) | KJ919553<br>KJ919517<br>KJ919551<br>KJ753665<br>JQ069727 |
| Segment 7 (NSP1)   | A8 (porcine)         | 3                              | 3.01E-37 and 8.622E-30                         | (1434–25) – (573–596)                  | KP753174<br>KJ753184<br>KP752951                         |
| Segment 8 (NSP2)   | N1                   | 3                              | 3.689E-13 and 4.054E-06                        | 485 (455–499) – 889 (868–914)          | KJ753657<br>KM026663<br>KM026664                         |
| Segment 9 (VP7)    | G6 (bovine)          | 2                              | 6.240E-12 and 2.780E-05                        | 1048 (1032–128) – 481 (448–506)        | HM591496<br>KF170899                                     |
| Segment 9 (VP7)    | G1 & G2              | 2                              | 5.507E-38 and 1.664E-30                        | 55 (994–60) – 291 (262–296)            | KC443034<br>MG181727                                     |
| Segment 9 (VP7)    | G1 & G3              | 2                              | 1.4E-23 and 4.230E-16                          | 857 (833–859) – 1019 (991–51)          | KJ751729<br>KP752817                                     |
| Segment 9 (VP7)    | G1 & G9              | 2                              | 5.292E-19 and 1.599E-11                        | 362 (346–366) – 589 (558–605)          | AF281044<br>GQ433992                                     |

196

197 *Segment 1 Intragenotypic Recombination Resulting in a New Lineage*

198 Segment 1 (VP1; ~3,302 base pairs) showed evidence of a recombination event within the R2 clade that  
199 was fixed in the population, and resulted in a new lineage (highlighted clade in Fig. 2; Fig. 3; Table 2). The  
200 multiple comparison (MC) uncorrected and corrected probabilities were 1.305E-16 and 3.332E-09 respectively.  
201 The sequence most closely related to the recombined sequence was KU199270, a human isolate from  
202 Bangladesh in 2010 (Aida, Nahar et al. 2016). Phylogenetic analysis using tip calibration suggests that the  
203 recombination event occurred no later than 2000-2005 (node Cis), so if this is a true recombination event, the  
204 2010 sequence is not the original recombinant. The recombinant region is 100% similar to an isolate also from  
205 Bangladesh in 2010 (KU248372) (Aida, Nahar et al. 2016), which also has a putative recombinant sequence in  
206 another region of its genome. The breakpoint regions (99% CI: (541-711) — (1327-1445)) may represent a  
207 potential hotspot for segment 1 recombination as multiple recombination events show breakpoints in this area

208 (Table 2). Phylogenetic analysis of the alignment of 250 representative sequences containing only the putative  
209 recombinant region compared with the rest of the segment 1 sequence showed a consistent subclade shift within  
210 the R2 clade. The recombination events resulted in the incorporation of the following amino acid substitutions in  
211 the recombinant strains when compared to the major parent strain: 227 (K→E), 293 (D→N), 297 (K→R), 305  
212 (N→K), and 350 (K→E).  
213

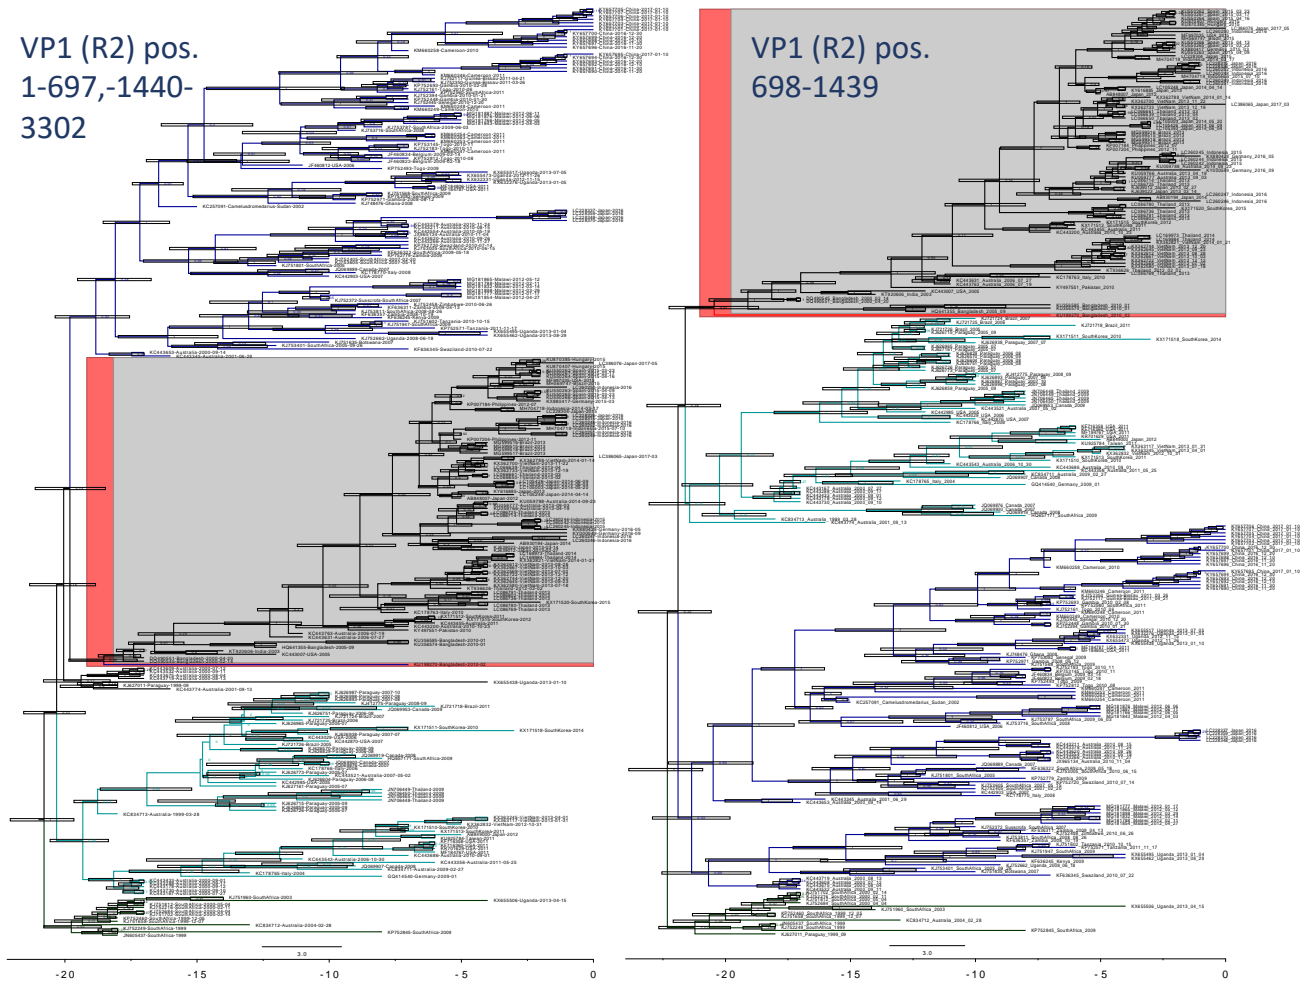

214  
215 **Figure 2.** Bayesian phylogenetic analysis of a possible recombination event in VP1 that became fixed in the  
216 population. The strain closest to the recombination event is highlighted in red. Major clades are colored to  
217 show the phylogenetic incongruity. Nodes are labeled with posterior probabilities with 95% node height  
218 intervals shown. Time axis at the bottom is in years before 2017.

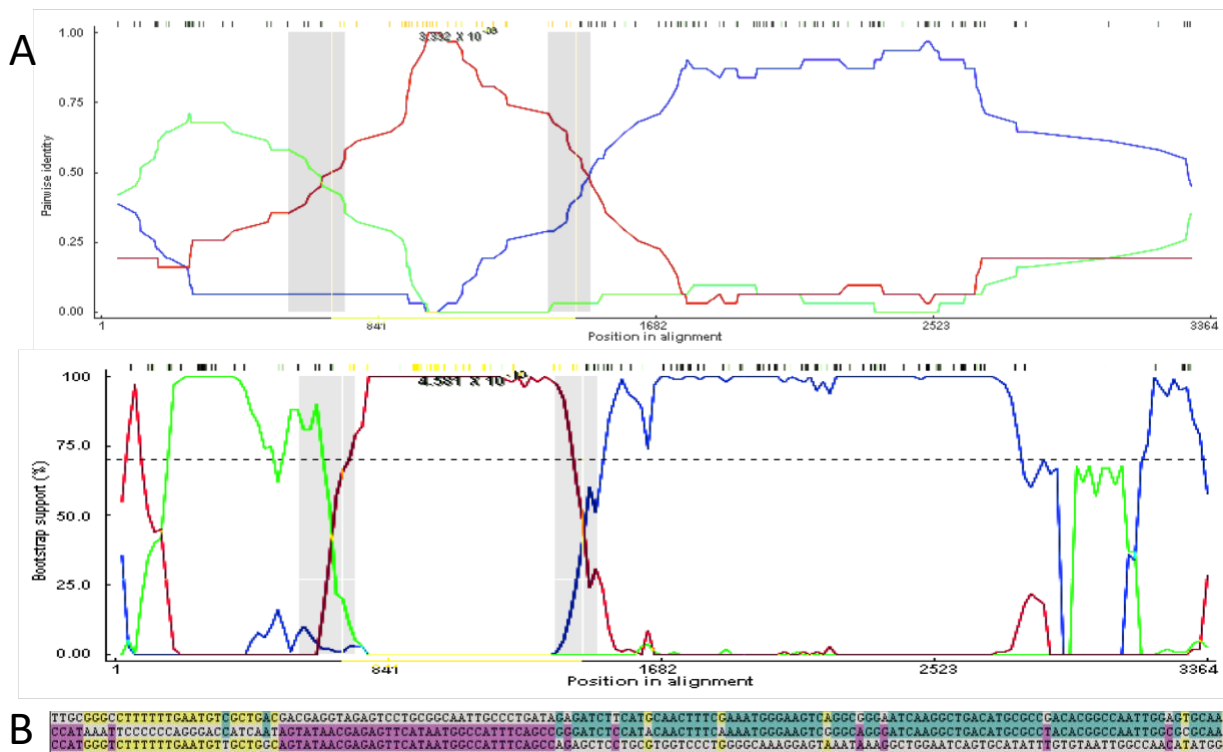

219

220 **Figure 3.** A) An RDP analysis (top) and a BootScan analysis (bottom) showing a putative recombination event  
 221 between two R2 segment 1 genotypes. The red line compares the minor parent to the recombinant, blue line  
 222 compares the major parent to the recombinant, and the green line compares the major parent to the minor  
 223 parent. The Y-axis for RDP (top) is the pairwise identity, while the Y-axis for BootScan (bottom) is the bootstrap  
 224 support. The X-axis is the sequence along segment 1. B) The relevant sites shown above color-coded to strain  
 225 that the recombinant matches. The recombinant is the middle sequence, the minor parent is the bottom  
 226 sequence, and the major parent is the top sequence. Mutations matching the major sequence are shown in blue,  
 227 while mutations matching the minor parent are shown in purple. Yellow mutations show mutations not present  
 228 in the recombinant sequence but which match the major and minor parent, possibly suggesting a second  
 229 recombination event.

230

### 231 Segment 3 Intragenic Recombination

232

233 Two recombination events occurring in segment 3 (VP3) appear to have fixed in the population, and are  
 234 seen in many descendant sequences (Table 2). The first strain identified as a putative recombinant is KJ753665,  
 235 an isolate from South Africa in 2004. The recombinant region occurs between positions (2129-2174) — 2531.  
 236 This region is 98.7% identical to a porcine strain isolated in Uganda in 2016 (KY055418)(Bwogi, Jere et al.  
 237 2017), while the rest of segment 3 is 95.8% similar to a 2009 human isolate from Ethiopia (KJ752028). The  
 238 Monte Carlo uncorrected and corrected probabilities were 2.491E-20 and 6.946E-13, respectively, with 107  
 239 isolates flagged as possibly derived from the recombination event. Phylogenetic analysis using 450 randomly  
 240 selected VP3 sequences (excluding sequences lacking collection dates) within the putative recombinant region,  
 241 along with an analysis of the genome excluding the two major recombination events, resulted in five sequences  
 showing a significant phylogenetic incongruity (Fig. 4). The incongruity appeared between sub-lineages within

242 the larger M1 lineage of VP3. Amino acid substitutions in the recombinant region included positions 748  
243 (M→T) and 780 (T→M).

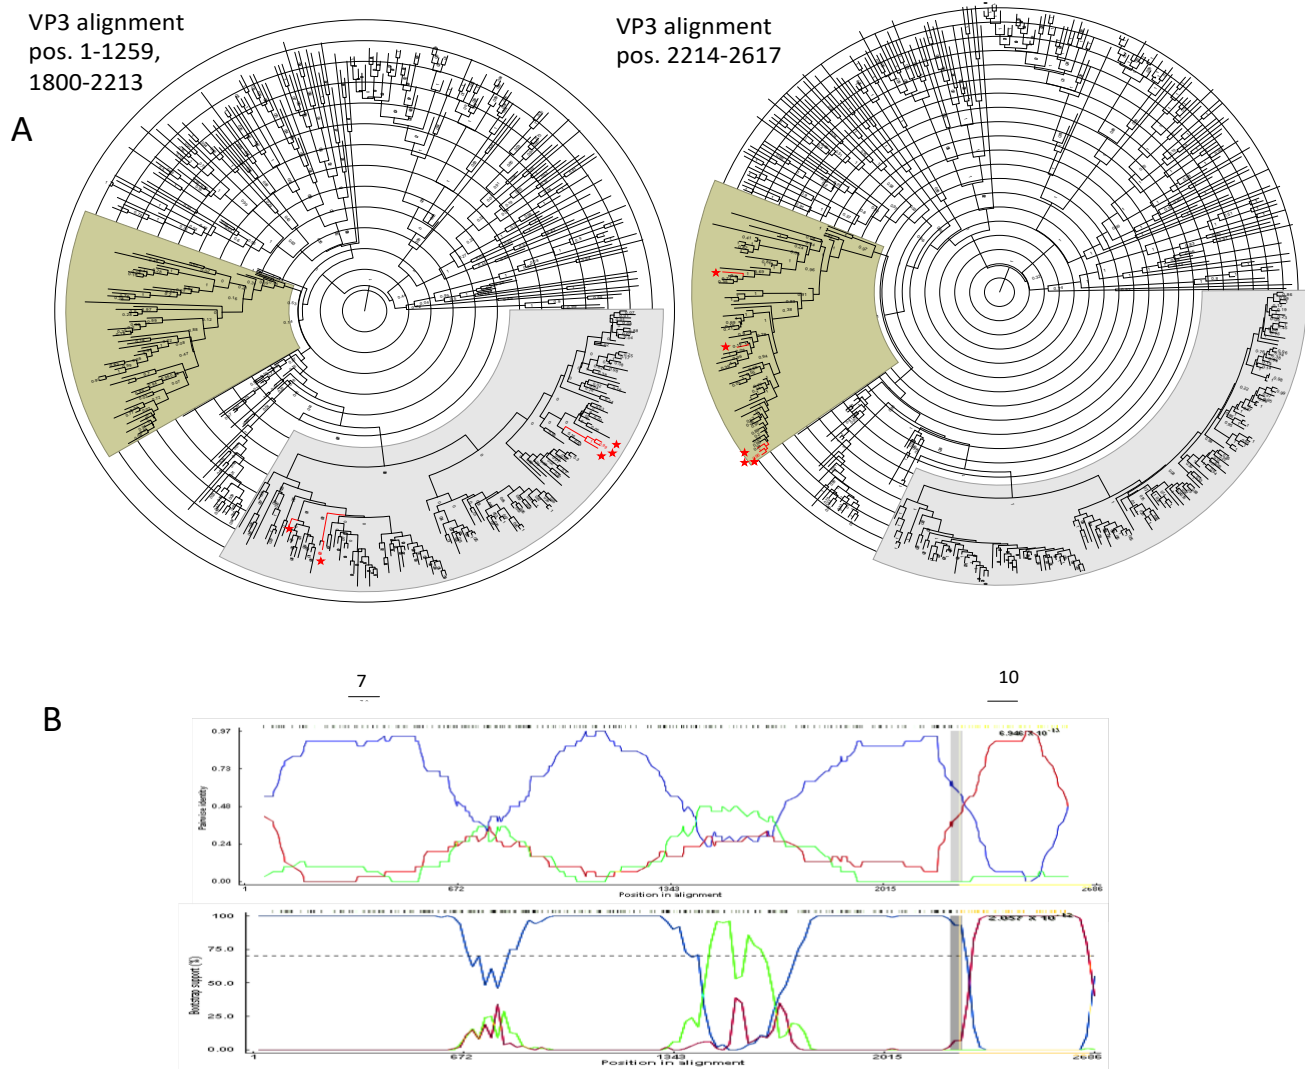

244  
245 **Figure 1.** Segment 3 recombination event supported by multiple isolates. A) Phylogenetic trees made using  
246 alignments from (left) nucleotide positions 1-1259 and 1800-2213 representing the major parent region  
247 excluding second recombination event (Fig. 5), and (right) nucleotide position 2214-2617 representing the  
248 minor parent sequence. B) BootScan (top) and RDP (bottom) analyses. The red line compares the minor parent  
249 to the recombinant, blue line compares the major parent to the recombinant, and the green line compares the  
250 major parent to the minor parent. The Y-axis for the BootScan analysis (top) is the bootstrap support, while the  
251 Y-axis for the RDP analysis (bottom) is the pairwise identity. The X-axis for both analyses is the sequence along  
252 segment 3.

253

254

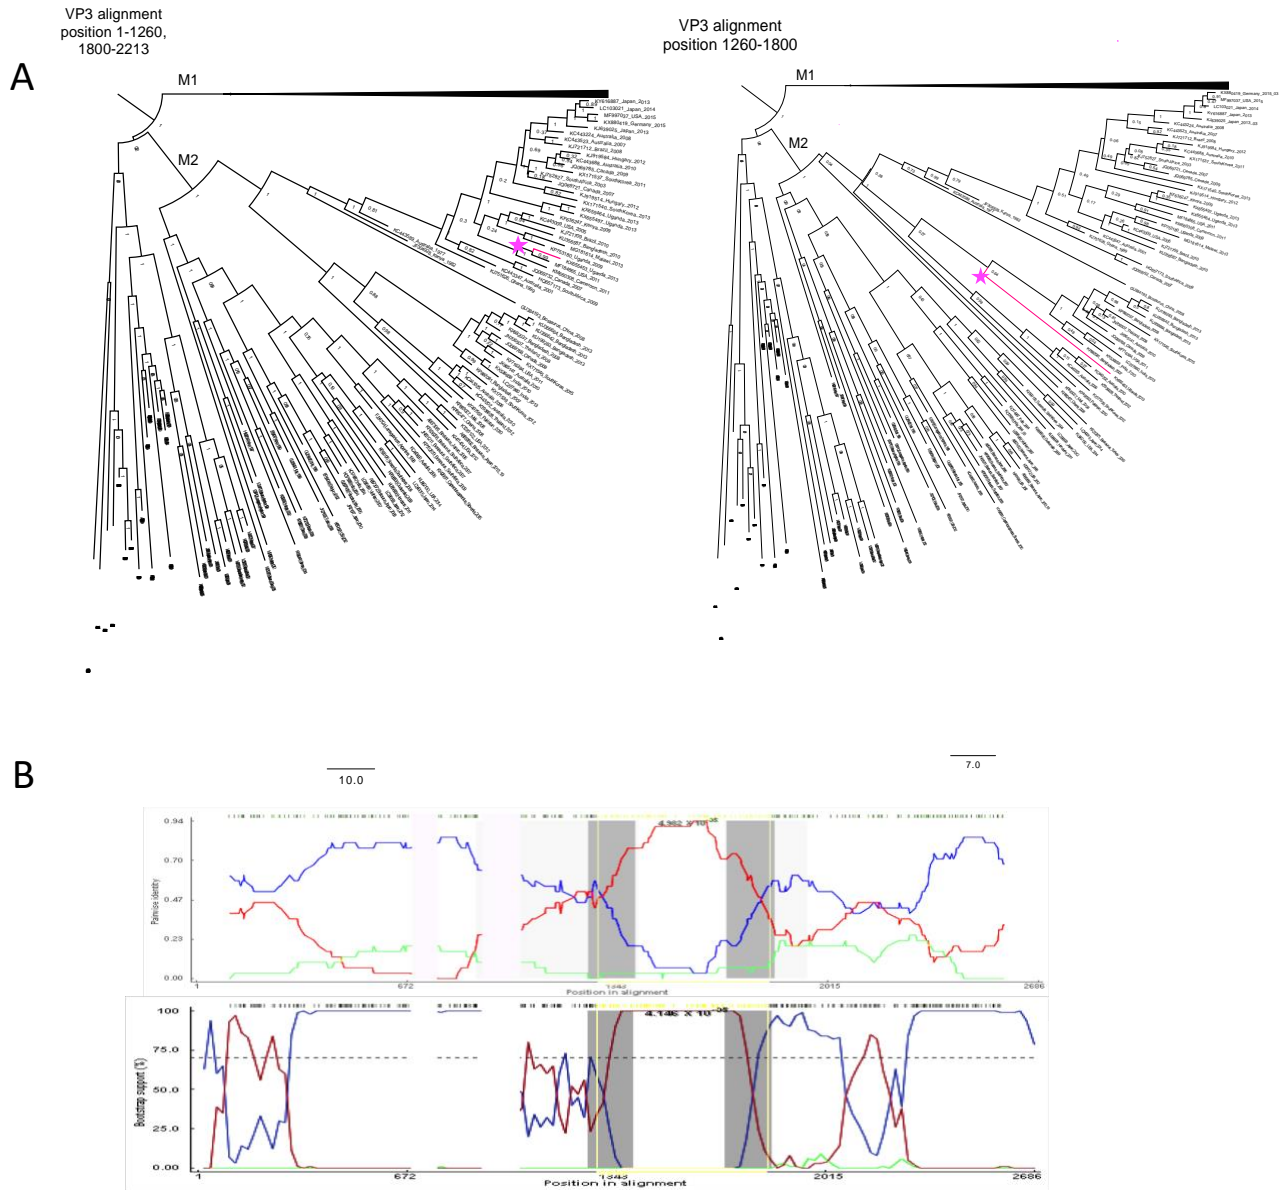

255

256 **Figure 5.** A) Phylogenetic analysis of segment 3. Left tree (major parent) was made from an alignment of  
 257 nucleotide positions 1-1260 and 1900-2213 and right tree (minor parent) was made from nucleotide positions  
 258 1260-1800. M2 strains have been collapsed, and recombinant is colored in pink. B) BootScan (top) and RDP  
 259 analyses (bottom) of VP3 M2 putative recombinant. The red line compares the minor parent to the recombinant,  
 260 blue line compares the major parent to the recombinant, and the green line compares the major parent to the  
 261 minor parent. The Y-axis for BootScan is the bootstrap support, while the Y-axis for the RDP analysis is the  
 262 pairwise identity. The X-axis in both analyses is the segment 3 sequence.

263

264

265 A second potential recombination event was identified in segment 3 between sublineages within the M2  
 266 lineage (Table 2; Fig. 5). However, when we created split alignments and ran a phylogenetic analysis in BEAST  
 267 v1.10.4, only one sequence showed a phylogenetic incongruity supporting this event (KX655453). Amino acid  
 268 substitutions as a result of this event included positions 405 (I→V), 412 (V→M), 414 (N→D), 441 (N→D), 458  
 (I→V), 459 (I→T), 468 (L→F), 473 (N→D), 486 (M→I), 518 (N→S), and 519 (E→G).



269 One possible complication with relying on phylogenetic incongruity as evidence of major recombination  
270 events is that a recombinant virus may evolve faster than the parental strains, and, despite possessing an initial  
271 fitness advantage such as immune avoidance, may eventually converge back towards the major parent's  
272 sequence. Thus, phylogenetic analysis likely underestimates the frequency of transiently stable recombination  
273 events in a population. This phenomenon may account for the observation that the number of VP3 isolates  
274 flagged as deriving from a recombination event based on sequence analysis is greater than the prevalence of  
275 recombination predicted by the phylogenetic analysis.

#### 276 *Intergenotypic Recombination*

277 We found strong evidence for intergenotype recombination in all segments except segment 7 (NSP3)  
278 and segment 11 (NSP5) (Table 1; Supplementary Table 1). Instances of intergenotypic recombination in  
279 segment 1 (VP1) (KU714444, JQ988899) only occurred in regions where the amino acid sequence was highly  
280 conserved across genotypes, so these events resulted in few, if any, nonsynonymous mutations. Of the putative  
281 events observed in more than two environmental isolates with strong support from detection methods, only  
282 events in segment 9 (VP7) occurred between different genotypes (Table 2). The segment 9 recombinant region  
283 amino acid substitutions that match the minor parent and differ from the major parent are shown in  
284 Supplementary Table 2.

#### 285 *Structural Prediction of Recombinant Proteins*

286 The protein models generated by I-TASSER for the intergenotypic recombinant G proteins showed that,  
287 although the amino acid changes for the G1-G2 recombinant were substantial (25 changes) (Supplementary  
288 Table 2), the secondary and tertiary structures seemed largely intact (Fig. 6). The G3-G1 and G6-G6  
289 recombinants each showed four amino acid changes. The G9-G1 recombinant showed the most secondary  
290 structure disruption, including a loss of beta sheets, a loss of antiparallel beta sheets, and slightly shorter beta  
291 sheets/helices, which could indicate lower stability. However, based on the structural modeling, the tertiary  
292 structure appeared to be maintained, suggesting that the putative recombinant glycoproteins were able to form  
293 properly folded G-proteins (Fig. 6).

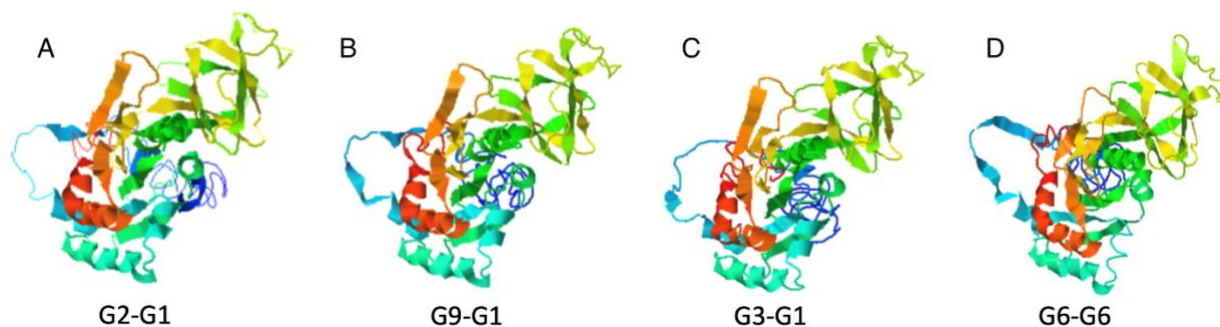

294

295 **Figure 6.** VP7 protein structures were predicted from amino acid alignments of the four strongly  
296 supported G recombinants using I-TASSER. C-scores are confidence scores estimating the quality of  
297 the predicted model, and range from [-5, 2], with higher scores indicate greater confidence A) G2-G1,



298 *C-score = -1.38, KC443034; B) G9-G1:AF281044, C-score = -1.29; C) G3-G1, C-score = -1.27*  
299 *KJ751729; D) G6-G6: KF170899, C-score = -1.42.*  
300

301 Antigenic epitope predictions generated by IEDB (Vita, Mahajan et al. 2019) and SVMTriP (Yao,  
302 Zhang et al. 2012), as well as a large study done on mammalian G-types (Ghosh, Chattopadhyay et al. 2012),  
303 showed that VP7 recombination occasionally results in amino acid substitutions in conserved epitopes  
304 (Supplementary Table 2). For example, the amino acid sequence RVNWKKWWQV is usually flagged as, or  
305 part of, an epitope in most G types including G2, G3, G4, G6, G9, but not in G1. In the G2-G1 recombination  
306 event flagged in multiple isolates (Table 2; Figure 1), this region is altered (sometimes a KR substitution and  
307 sometimes multiple amino acid substitutions) (Supplementary Table 2). Moreover, despite containing highly  
308 variable regions, the region where the recombination occurred had low solvent accessibility. The G3-G1  
309 recombinant had amino acid substitutions in two of four conserved epitope regions due to the recombination  
310 event. There was also a conserved epitope sequence around amino acids 297-316 in G9 proteins that was altered  
311 in the G9-G1 recombinant so it no longer appeared as an epitope.

312 Structural predictions generated by I-TASSER suggest that, although the amino acid sequences may  
313 diverge, the protein folding and three-dimensional structures remain relatively conserved (Fig. 6). Thus,  
314 although the amino acid sequence substitutions do not result in significant changes to the protein structure, they  
315 may nevertheless reduce binding by antibodies or T-cell receptors, and may provide a selective advantage in  
316 allowing the virus to avoid immune surveillance.

#### 317 *Recombination Junctions Often Correspond to RNA Secondary Structure Elements*

318 Breakpoint distribution plots showed the sequence regions with the most breakpoints. These breakpoints  
319 often corresponded to hairpins predicted by RNAalifold. Secondary RNA structure predictions for segment 9  
320 (VP7) genotypes G1, G2, G6 and G9 are shown as mountain plots (Fig. 7). The breakpoints of the segment 9  
321 recombination events correspond to areas leading to the peaks in the mountain plots (Fig. 7). The peaks indicate  
322 a conserved hairpin loop, with the sequences leading up to the peak being the double-stranded portion of the  
323 hairpin. Breakpoint distributions also appeared to correspond to secondary structure predictions made from  
324 alignments of segment 1 (VP1) and segment (VP6) (Fig. 8). Segment 4 (VP4) RNA secondary structure  
325 predictions (Supplementary Fig. 1) showed greater variation across genotypes, so while breakpoints did coincide  
326 with secondary RNA structures as predicted by the models, there were not enough events in each genotype to  
327 provide strong support that the breakpoints were correlated with secondary structure. The breakpoint  
328 distributions for NSP1 and VP3 were also non-randomly distributed across the sequence (Supplementary Fig. 1),  
329 however secondary structure predictions from these alignments were not consistent, so are not shown  
330 (Supplementary Fig. 2).

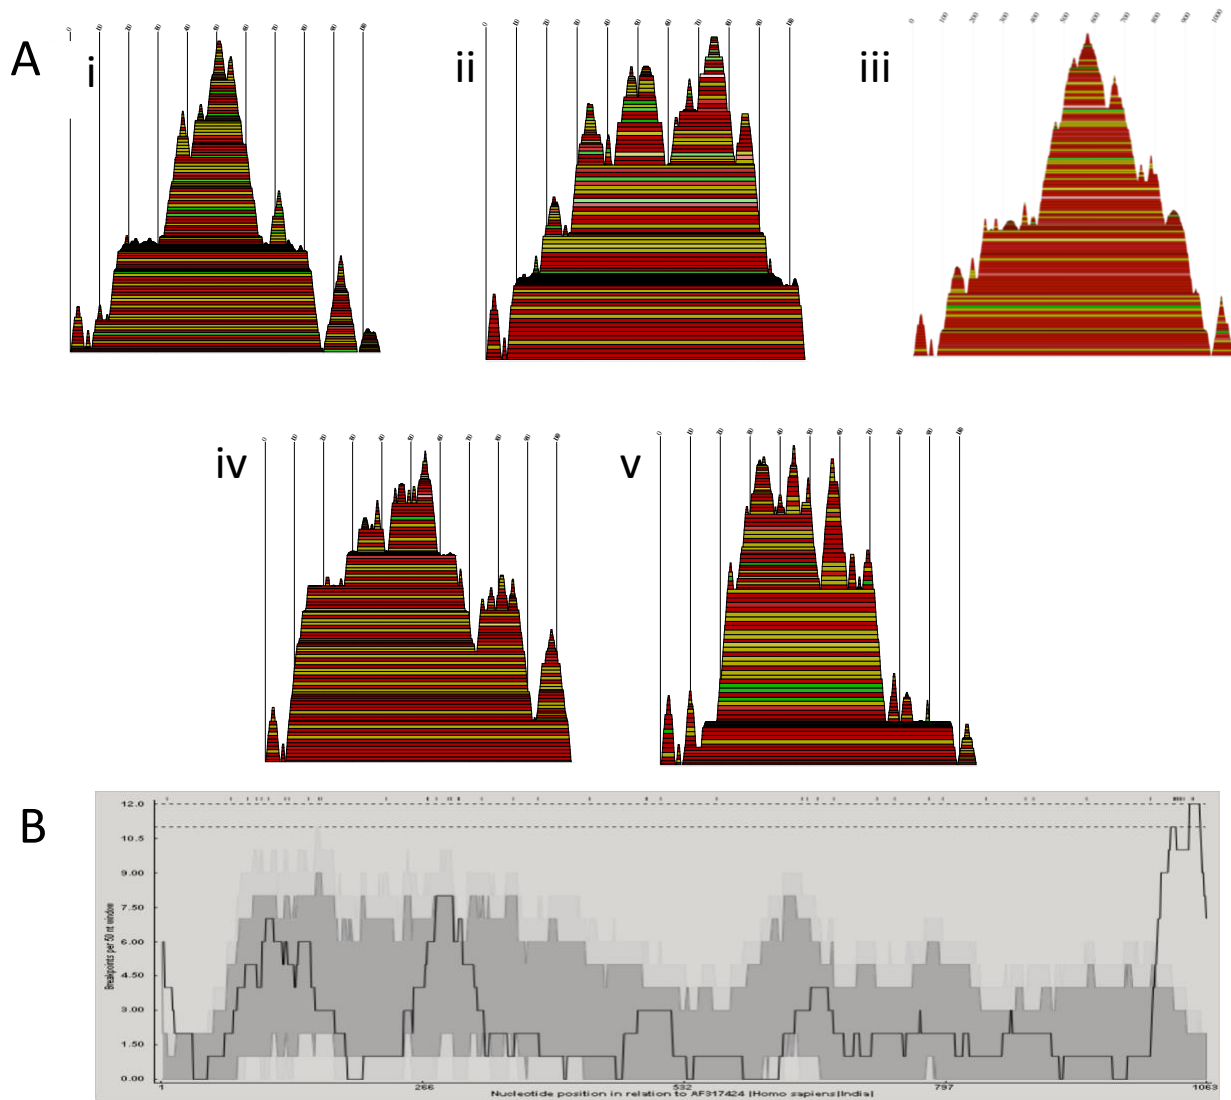

331

332 **Figure 7.** A) Consensus mountain plots made in RNAalifold using the ViennaRNA package of the predicted RNA  
333 secondary structures based on alignments made using full sequences for each of the five segment 9 G types  
334 involved in the intergenotypic recombination events: (i) G9 (ii) G6 (iii) G3 (iv) G1 (v) G2. Peaks represent  
335 hairpin loops, slopes correspond to helices, and plateaus correspond to loops. The X-axis corresponds to the  
336 sequence of the segment. Each base-pairing is represented by a horizontal box where the height of the box  
337 corresponds with the thermodynamic likelihood of the pairing. The colors correspond to the variation of base  
338 pairings at that position. Red indicates the base pairs are highly conserved across all the sequences, and black  
339 indicates the least conservation of those base pairings. B) Breakpoint distribution plots made in RDP4 of  
340 putative recombinants in segment 9. The X-axis shows the position in the sequence, and Y-axis shows the  
341 number of breakpoints per 50 nucleotide window. The highest peaks are around X = 115, 285, 1050.

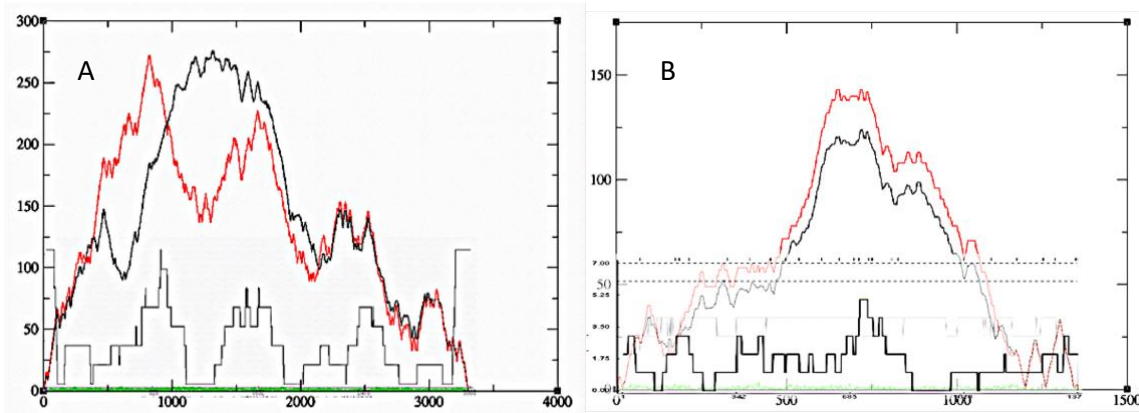

342

343 **Figure 8.** Consensus mountain plots overlaid with breakpoint distribution plots for recombination events in A)  
344 VP6 and B) VP1. Position in the nucleotide sequence is on the X-axis. The entropy curve represented in green.  
345 The black curve represents the pairing probabilities, and the red curve represents the minimum free energy  
346 structure with well-defined regions having low entropy.  
347

348

## 348 Discussion

### 349 Detecting Recombination: Recognizing Type I and Type II Error

350 Apparent instances of recombination may actually be the result of convergent evolution, lineage-  
351 specific rate variation, sequencing error, poor sequence alignment, laboratory contamination or improper  
352 bioinformatics analysis (Worobey, Rambaut et al. 2002, Boni, de Jong et al. 2010, Bertrand, Töpel et al. 2012,  
353 Boni, Smith et al. 2012). Several steps can be taken to minimize incorrect attribution of viral recombination.  
354 Ideally this process should begin at the time of sequencing. First, it should be confirmed that the originating  
355 sample did not come from a host infected with multiple genotypes of the same virus type. Prior to RNA  
356 extraction, single plaques should be repeatedly picked and plated (i.e. plaque purification) to ensure that  
357 multiple genotypes are not inadvertently sequenced. Similarly, care must be taken when sequencing multiple  
358 samples of the same virus to minimize the possibility of cross-contamination.

359 For sequences obtained from online repositories, such precautions are rarely possible. Instead careful  
360 bioinformatics procedures can help minimize possible errors. As typical first step in identifying recombination  
361 events, virus genome sequences are analyzed with software such as RDP4 (Martin, Murrell et al. 2015), but all  
362 software programs are prone to error. For example, programs may falsely identify a recombination event when  
363 none exists (type I error) or fail to detect a true recombination event when one exists (type II error). Several  
364 studies measured errors incurred by RDP4 in the analysis of the genomes of tick-borne encephalitis virus, a  
365 positive-sense RNA flavivirus that rarely recombines (Norberg, Roth et al. 2013, Bertrand, Johansson et al.  
366 2016). The results of the analyses indicated that recombination was overestimated in these viruses, and that  
367 certain detection methods were more prone to type I error (Norberg, Roth et al. 2013, Bertrand, Johansson et al.  
368 2016). MaxChi, Chimaera, and SiScan showed higher false positive rates than other RDP4 programs, but had  
369 greater power to detect true recombination events. By contrast, 3Seq and GENECONV displayed lower false  
370 positive rates, but had the lowest detection power of true events.

371 False positives using RDP4 are especially common among closely related strains (Bertrand, Johansson  
372 et al. 2016). That said, recombination events are likely occur between closely related strains given their close  
373 spatial/temporal proximity and genetic compatibility, so caution should be used in inferring events between  
374 highly dissimilar genotypes. When a positive recombination signal has been detected, it is essential to assess its  
375 statistical significance. However, in RDP4, the  $P$ -value of 0.05 does not correspond to a 5% rate of false  
376 positives (Bertrand, Johansson et al. 2016), therefore we used a cut-off value of  $10E-04$  and focused only on  
377 events where at least six RDP4 programs detected the putative recombinant.

378 After identifying putative recombination events, additional strategies can be used to eliminate errors.  
379 For example, rates of type I and type II error increase with shorter length recombination regions (Boni, Zhou et  
380 al. 2008, Norberg, Roth et al. 2013, Bertrand, Johansson et al. 2016). Therefore, we ignored any putative  
381 recombination events of  $< 100$ nt with the exception of one isolate in segment 4 (NSP4) and one isolate in  
382 segment 5 (NSP5) as the putative recombinant regions in these isolates were in conserved regions at the ends of  
383 the respective segments (Supplementary Table 1). In addition, we visually inspected sequence alignments to  
384 exclude misaligned sequences (Boni, de Jong et al. 2010). Splitting alignments by major and minor parent  
385 followed by carefully parameterized BEAST runs may help distinguish genuine phylogenetic incongruity  
386 signals from spurious false positives. Furthermore, we checked for the presence of unique polymorphisms  
387 differing from the parent strains within the suspected recombination region as they may provide evidence that  
388 recombination events are not laboratory artifacts. Presumably such substitutions would reflect subsequent  
389 adaptive evolution by the recombinant virus.

390 In addition, we noted how many times the same recombination event occurred across multiple samples  
391 since false positive recombinants are likely to be present as single isolates in phylogenetic trees (Boni, de Jong  
392 et al. 2010). The more isolates showing the same event, the greater the probability that it represents a true  
393 recombination event, especially if the isolates were acquired and sequenced by different laboratories. Events that  
394 showed strong support, but were only isolated in one sequence are noted (Supplementary Table 1), but not  
395 discussed, as it is difficult to rule out the possibility of type I error due to PCR or mosaic contig assembly (Boni,  
396 de Jong et al. 2010, Varsani, Lefeuvre et al. 2018).

397 Sequence metadata can also be used to identify unlikely recombination events. For an event to be  
398 plausible, the major and minor parents should have had opportunity to coinfect the same host, which is only  
399 possible if they are congruent in time and space (Boni, de Jong et al. 2010). For example, one study identified  
400 influenza A virus strain A/Taiwan/4845/99 as a recombinant of A/Wellington/24/2000 and A/WSN/33 (He, Han  
401 et al. 2008). Given that the two parents were isolated 77 years apart in different parts of the world, it is  
402 exceedingly unlikely that is a natural recombination event. Any putative recombination events should be  
403 carefully screened to determine if the parental strains could have plausibly interacted. In Supplementary Table 1,  
404 we include information on source species, year and place of isolation, % average nucleotide identity, and  
405 genogroup for all putative recombinants and their major and minor parents.

406 *Naturally High Coinfection in Rotavirus A*

407 Some features of rotavirus biology make recombination not only possible, but also relatively plausible.  
408 Rotaviruses are often released from cells as aggregates of approximately 5-15 particles contained within  
409 extracellular vesicles (Santiana, Ghosh et al. 2018). While it is not yet clear whether these extracellular vesicles  
410 can contain different rotavirus genotypes, they do allow for rotavirus coinfection even at low multiplicities of  
411 infection. Thus, the physical barriers to recombination in dsRNA viruses (Lai 1992) may be offset by the high  
412 rates of coinfection resulting from vesicle transmission of rotaviruses.

413 Furthermore, infection of hosts by multiple rotavirus strains appears to be relatively common. In a study  
414 of 100 children in the Detroit area, G and P typing, which identifies the serotype of the VP7 and VP4 proteins  
415 respectively, revealed that ~10% of patients were infected with multiple rotavirus A strains (Abdel-Haq,  
416 Thomas et al. 2003). Similarly high frequencies of G and P mixed genotype infections were observed in children  
417 sampled in India (three studies showing multiple G types in 11.3 %, 12% and 21% of samples) (Husain, Seth et  
418 al. 1996, Jain, Das et al. 2001, Khetawat, Dutta et al. 2002), Spain (>11.4% of samples) (Sánchez-Fauquier,  
419 Montero et al. 2006), Kenya (5.9%) (Kiulia, Peenze et al. 2006), Africa (12%) (Mwenda, Ntoto et al. 2010), and  
420 Mexico (5.6% in 2010, 33.5% in 2012) (Anaya-Molina, De La Cruz Hernández et al. 2018). Even higher  
421 frequencies of mixed genotype infections were observed in whole genome studies. For example, among 39  
422 Peruvian fecal samples genotyped using multiplexed PCR, 33 (84.6%) showed evidence of multiple rotavirus  
423 genotypes (Rojas, Dias et al. 2019). In another study, whole genome deep sequencing revealed that 15/61 (25%)  
424 samples obtained in Kenya contained multiple rotavirus genotypes (Mwanga, Nyaigoti et al. 2018). Given the  
425 high genetic diversity of rotavirus populations (Kirkwood 2010, Ghosh and Kobayashi 2011, Sadiq, Bostan et  
426 al. 2018), and their proficiency in infecting a broad range of mammalian hosts including many domesticated  
427 animal species (Martella, Banyai et al. 2010, Doro, Farkas et al. 2015), the high frequencies of hosts infected  
428 with multiple genotypes is not entirely surprising. These coinfections present abundant opportunities for  
429 rotavirus recombination.

#### 430 *Rotavirus Recombination Generates Genetic Diversity*

431 Homologous recombination previously has not been considered a significant driver in rotavirus genetic  
432 diversity and evolution (Ramig 1997, Woods 2015). Recombination is usually expected to be deleterious as the  
433 breakage of open reading frames may disrupt RNA secondary structure and alter protein functionality (Lai 1992,  
434 Simon-Loriere and Holmes 2011). However, recombination, as with reassortment (Ramig and Ward 1991,  
435 Iturriza-Gomara, Isherwood et al. 2001, Schumann, Hotzel et al. 2009, Ghosh and Kobayashi 2011, Jere,  
436 Chaguza et al. 2018), may further increase rotavirus genetic diversity due to epistatic interactions resulting in  
437 reassortant-specific or recombinant-specific mutations (Zeldovich, Liu et al. 2015). Formerly deleterious  
438 mutations may become beneficial when the genetic background changes, resulting in an increase in circulating  
439 pathogenically relevant viral strains.

440 In our study, most recombination events occurred between strains of the same genotype (Fig. 1; Table 2;  
441 Supplementary Table 1). This outcome is consistent with the expectation that intragenotypic is more common  
442 since it would less likely to disrupt protein or secondary RNA structure. Nonetheless, intragenotypic



443 recombination can have long lasting effects on rotavirus genetic diversity. For example, we identified a  
444 recombinant sub-lineage within the R2 clade of segment 1, the polymerase-encoding segment (Fig. 2; Fig. 3;  
445 Table 2). As the same event is found in strains isolated years apart from geographically distant locations, we can  
446 infer that the resulting genotype was sufficiently fit enough to be maintained in the population and disperse  
447 widely (Supplementary Table 1). This finding suggests that this homologous recombination event has had a  
448 long-term effect on rotavirus diversity.

449 While comparatively less common, we observed instances of intergenotypic recombination in all  
450 segments with the exception of segment 7 (NSP3), the only segment where we observed no recombination  
451 events (Table 2; Supplementary Table 1). A previous study reported intergenotypic recombination events in  
452 segment 6 (VP6), segment 8 (NSP2), and segment 10 (NSP4) (Jere, Mlera et al. 2011), so our study adds to the  
453 number of segments able to tolerate intergenotypic recombination. Interestingly, the serotype proteins, VP4 and  
454 VP7, have the most different genotypes, with 51 and 36 respectively (Steger, Boudreaux et al. 2019). Given this  
455 genetic diversity, the chances of two viruses with different G or P types coinfecting a cell is substantially higher  
456 than other segments. In addition, both VP4 and VP7 seem to be more prone to reassortment, and to tolerate more  
457 divergent genetic backgrounds or genome constellations (Martella, Ciarlet et al. 2003, Gentsch, Laird et al.  
458 2005, McDonald, Matthijssens et al. 2009, Patton 2012). This diversity and tolerance of many different genetic  
459 backgrounds implies that VP4 and VP7 may be more tolerant of recombination between divergent strains than  
460 the other segments. Our data seem to support this claim.

461 Specifically, we observed numerous instances of intergenotypic recombination in segment 9, the VP7  
462 coding segment (Table 2; Supplementary Table 1). These events appear to be beneficial because the  
463 recombinant genotypes persisted in populations long enough for multiple samples showing the same event to be  
464 sampled (Table 2). For example, the same mosaic VP7 G6 gene (Fig. 8) was sequenced in multiple bovine  
465 strains, one isolated in 2009 (HM591496) and another in 2012 (KF170899), by two separate research groups.  
466 While still differentiable, the parents are closely related. However, in some instances, events between highly  
467 divergent genotypes seem to have been able to persist in populations. Both a 2014 Malawi isolate (MG181727)  
468 and a 2006 isolate from the United States (KC443034) showed a similar G1-G2 VP7 mosaic gene (Fig. 8). The  
469 fact that these two G genotypes are highly divergent from one another and were identified in different years in  
470 different locations by different research groups supports the contention that it is a true recombination event.  
471 Altogether, 22/24 instances of recombination in segment 9 occurred between different G serotypes  
472 (Supplementary Table 1). These examples indicate that mosaic genes formed from two divergent genotypes are  
473 relatively common and increase the diversity of circulating VP7 genotypes.

474 In addition, 7/16 instances of recombination in segment 4 (VP4) were intergenotypic. Recombination  
475 was observed between P4-P8, P6-P8, and P8-P14 serotypes (Supplementary Table 1). P4, P6 and P8 are all  
476 relatively closely related being in the P[II] genogroup, while P14 is in the P[III] genogroup. These putative  
477 recombination events suggest that relevant serotype diversity in human hosts is expanding. However, as P4, P6,



478 and P8 are also the dominant P types in human infections, there is a sampling bias towards this genogroup as the  
479 genotypes within this group are more likely to coinfect humans, so caution should be taken with this conclusion.

480 Segment 5 (NSP1) also showed recombination between highly divergent strains. Not only is NSP1 not  
481 strictly required for viral replication (Hua, Chen et al. 1994), it is also the least conserved of all rotavirus  
482 proteins, including even the serotype proteins VP4 and VP7 (Arnold and Patton 2011), suggesting that  
483 intergenotypic recombination disrupting the protein's amino acid sequence may be less likely to be deleterious.

484 Segments 7 (NSP3), 8 (NSP2), 10 (NSP4), and 11 (NSP5) all had low rates of recombination. These  
485 segments are short thus recombination is expected to be less likely, however segment 9 (VP7), one of the  
486 smallest segments, defies this pattern, having a high number of events observed. The smaller segments may also  
487 be less able to tolerate recombination events due to the important roles they play during the formation and  
488 stabilization of the supramolecular RNA complex (Fajardo, Sung et al. 2015) during rotavirus packaging and  
489 assembly (Li, Manktelow et al. 2010, Suzuki 2015, Borodavka, Dykeman et al. 2017, Fajardo, Sung et al. 2017).

#### 490 *Generation of Escape Mutants*

491 Recombination involving regions encoding conserved epitopes, especially in segments that encode  
492 proteins involved in host cell attachment and entry, may provide selective advantages to rotaviruses by allowing  
493 them to evade inactivation by host-produced antibodies. These escape mutants may be generally less fit than  
494 wildtype viruses, but competitively advantaged in hosts because of a lack of host recognition. Subsequent  
495 intrahost adaptation may then select for compensatory fitness-increasing mutations allowing these strains to be  
496 competitive with circulating rotavirus strains. Many of the recombination events observed in our study appeared  
497 to generate such escape mutants. For example, we found two instances of the same segment 9 (VP7) G1-G3  
498 recombination event (Table 2; KJ751729 and KP752817) with amino acid changes in two of four conserved  
499 epitope regions due to the recombination event, which suggests that this strain prevailed in the population  
500 because it was better able to evade antibody neutralization.

501 Based on the I-TASSER structural predictions, the putative recombinant VP7 proteins detected in our  
502 survey appear able to fold properly and form functional proteins despite containing amino acid sequence from  
503 different 'parental' genotypes (Fig. 6). While the secondary structure appeared slightly altered (e.g., shorter beta  
504 sheets), the recombinant VP7 proteins generally maintained their 3-dimensional shape. The selective advantage  
505 from swapping epitopes may outweigh any potential decrease in protein stability resulting from recombination.

506 We also identified many recombination events involving segment 4 (VP4). In order to infect cells, VP4  
507 must be proteolytically cleaved to produce VP5\* and VP8\* (Arias, Romero et al. 1996). Most of the segment 4  
508 recombination events involved the spike head of the VP8\* protein or the spike body/stalk region of the VP5\*  
509 protein (antigen domain). Escape mutant studies (Zhou, Burns et al. 1994, Ludert, Ruiz et al. 2002, Aoki,  
510 Settembre et al. 2009, Nair, Feng et al. 2017) for VP4 show the VP8\* spike head recognizes histo-blood group  
511 antigens, which is one of rotavirus's main host range expansion barriers (Huang, Xia et al. 2012, Hu, Sankaran  
512 et al. 2018, Lee, Dickson et al. 2018). VP5\* mediates membrane penetration during cell entry (Yoder and  
513 Dormitzer 2006). VP4 recombinants therefore may help the virus expand host range and aid in immune evasion.

514 Segment 6 (VP6) also showed recombination events resulting in substantial amino acid changes. VP6 is  
515 a more conserved protein, but also an antigenic protein that interacts with naïve B cells (Parez, Garbarg-Chenon  
516 et al. 2004). This feature suggests that there may be selection for VP6 escape mutants to evade host immune  
517 responses. Structure analyses of VP6 indicated that it is relatively conserved across genotypes (Jiang,  
518 Tsunemitsu et al. 1992, Tang, Gilbert et al. 1997, Charpilienne, Lepault et al. 2002), which may explain why  
519 VP6 seems to have more frequent intergenotypic recombination. Conserved epitopes in VP6 exist around amino  
520 acid positions 197 to 214, and 308 to 316 (Aiyegbo, Eli et al. 2014).

#### 521 *Recombination in Other dsRNA Viruses*

522 Recombination has had a significant impact on the diversity of other dsRNA reoviruses (He, Ding et al.  
523 2010). One study of 692 complete bluetongue virus segments found evidence for at least 11 unique recombinant  
524 genotypes (1.6%) (He, Ding et al. 2010). The case for recombination among bluetongue viruses is strengthened  
525 by the fact that viruses containing the same (or similar) recombinant segments were isolated by different  
526 research groups in different countries at different times, indicating that the recombinant viruses persisted and  
527 spread following the recombination event (Carpi, Holmes et al. 2010, He, Ding et al. 2010). Another study found  
528 multiple possible instances of recombination in genome segment 8 (encoding NS2) of the epizootic hemorrhagic  
529 disease virus, a reovirus similar to bluetongue virus (Anthony, Maan et al. 2009). Several studies have reported  
530 recombination among the dsRNA rice black-streaked dwarf virus, which is also a member of the *Reoviridae*  
531 family, but infects plants (Li, Xia et al. 2013, Yin, Zheng et al. 2013). Putative recombinants were identified in  
532 six of the ten Southern rice black-streaked dwarf virus segments (Li, Xia et al. 2013, Yin, Zheng et al. 2013).  
533 Finally, intragenic recombination was observed in multiple isolates of the African horse sickness virus, an  
534 *Oribivirus* of the family *Reoviridae* (Ngoveni, van Schalkwyk et al. 2019). At least one of these events appeared  
535 in multiple subsequent lineages (Ngoveni, van Schalkwyk et al. 2019).

536 In study of the family *Birnaviridae*, 1,881 sequences were analyzed for evidence of recombination  
537 (Hon, Lam et al. 2008). While no interspecies recombination was observed, at least eight putative instances of  
538 intraspecies recombination were observed among the infectious bursal disease viruses and the aquabirnaviruses  
539 (Hon, Lam et al. 2008). Subsequent studies focusing on the infectious bursal disease viruses supported these  
540 results, and identified additional potential recombination events (He, Ma et al. 2009, Jackwood 2012, Vukea,  
541 Willows-Munro et al. 2014). We note that birnaviruses' genetic material is in a complex with ribonucleoprotein,  
542 while the genetic material of *Reoviridae* members is free in the virion, which could be a factor in differing rates  
543 of recombination across these dsRNA viruses.

544 Recombination has also been observed in dsRNA mycoviruses, including in the *Partitiviridae* (Botella,  
545 Tuomivirta et al. 2015) and the *Hypoviridae* (Carbone, Liu et al. 2004, Linder-Basso, Dynek et al. 2005, Feau,  
546 Dutech et al. 2014) and the *Totiviridae* (Voth, Mairura et al. 2006). Recombination in Gammartitivirus,  
547 which infects the fungus *Gremmeniella abietina*, may have permitted the virus to cross species borders (Botella,  
548 Tuomivirta et al. 2015). In cryphonectria hypovirus 1, which infects chestnut blight, recombination was  
549 implicated in the spread of the virus in Europe (Feau, Dutech et al. 2014). Collectively, these studies, and those

550 of other dsRNA families, suggest that not only is recombination possible, but also significantly impacts virus  
551 evolution. There is little doubt that this conclusion will be strengthened as more dsRNA viruses are discovered  
552 and/or sequenced.

### 553 *Possible Mechanism of Recombination in Rotavirus*

554         The precise mechanism for how rotavirus recombination occurs is unknown, but inferences can be made  
555 because many of the details regarding rotavirus replication and packaging have been resolved (McDonald and  
556 Patton 2011, Borodavka, Desselberger et al. 2018). The most-accepted hypothesis is that recombination takes  
557 place when the rotavirus +ssRNA is replicated after being packaged in the nucleocapsid (Esona, Roy et al. 2017,  
558 Jing, Zhang et al. 2018). For packaging and replication to occur, the eleven +ssRNA segments must join a  
559 protein complex consisting of the VP1 polymerase and the VP3 capping enzyme. Secondary RNA structures in  
560 the non-translated terminal regions (NTRs) aid in the formation of this supramolecular RNA complex (Fajardo,  
561 Sung et al. 2015, Borodavka, Dykeman et al. 2017) and determine whether the segments are packaged (Li,  
562 Manktelow et al. 2010, Suzuki 2015). Perhaps recombination occurs when multiple homologous RNA strands  
563 are joined in the same complex, allowing the homologous NTRs to partially hybridize. In this scenario, the VP1  
564 polymerase replicates part of one strand before switching to the other, thus producing a recombined segment.  
565 This conjecture is supported by the fact that recombination tends to occur in segment regions where self-  
566 hybridization forms three-dimensional structures. Moreover, rotavirus do not seem constrained from packaging  
567 extra genetic material (Desselberger 1996). A similar form of template switching is seen in poliovirus, an  
568 ssRNA virus, which exhibits high rates of recombination, although the precise mechanism may be different in  
569 that case insofar as in poliovirus, the polymerase may be stalled due to a hairpin or other secondary structure,  
570 and switches to a different template (Tolskaya, Romanova et al. 1987). Further study is needed to determine the  
571 precise mechanism of recombination in rotavirus.

572

573

## 574 **References**

- 575 Abdel-Haq, N. M., R. A. Thomas, B. I. Asmar, V. Zacharova and W. D. Lyman (2003). "Increased  
576 prevalence of G1P[4] genotype among children with rotavirus-associated gastroenteritis in  
577 metropolitan Detroit." *J Clin Microbiol* **41**(6): 2680-2682.
- 578 Aida, S., S. Nahar, S. K. Paul, M. A. Hossain, M. R. Kabir, S. R. Sarkar, S. Ahmed, S. Ghosh, N.  
579 Urushibara, M. Kawaguchiya, M. S. Aung, A. Sumi and N. Kobayashi (2016). "Whole genomic analysis  
580 of G2P[4] human Rotaviruses in Mymensingh, north-central Bangladesh." *Heliyon* **2**(9): e00168-  
581 e00168.
- 582 Aiyegbo, M. S., I. M. Eli, B. W. Spiller, D. R. Williams, R. Kim, D. E. Lee, T. Liu, S. Li, P. L. Stewart and J.  
583 E. Crowe, Jr. (2014). "Differential accessibility of a rotavirus VP6 epitope in trimers comprising type I,  
584 II, or III channels as revealed by binding of a human rotavirus VP6-specific antibody." *J Virol* **88**(1):  
585 469-476.
- 586 Anaya-Molina, Y., S. I. De La Cruz Hernández, A. E. Andrés-Dionicio, H. L. Terán-Vega, H. Méndez-  
587 Pérez, G. Castro-Escarpulli and H. García-Lozano (2018). "A one-step real-time RT-PCR helps to  
588 identify mixed rotavirus infections in Mexico." *Diagnostic Microbiology and Infectious Disease* **92**(4):  
589 288-293.
- 590 Anthony, S. J., N. Maan, S. Maan, G. Sutton, H. Attoui and P. P. C. Mertens (2009). "Genetic and  
591 phylogenetic analysis of the non-structural proteins NS1, NS2 and NS3 of epizootic haemorrhagic  
592 disease virus (EHDV)." *Virus Research* **145**(2): 211-219.
- 593 Aoki, S. T., E. C. Settembre, S. D. Trask, H. B. Greenberg, S. C. Harrison and P. R. Dormitzer (2009).  
594 "Structure of rotavirus outer-layer protein VP7 bound with a neutralizing Fab." *Science* **324**(5933):  
595 1444-1447.
- 596 Arias, C. F., P. Romero, V. Alvarez and S. Lopez (1996). "Trypsin activation pathway of rotavirus  
597 infectivity." *J Virol* **70**(9): 5832-5839.
- 598 Arnold, M. M. and J. T. Patton (2011). "Diversity of interferon antagonist activities mediated by NSP1  
599 proteins of different rotavirus strains." *J Virol* **85**(5): 1970-1979.
- 600 Banyai, K., G. Kemenesi, I. Budinski, F. Foldes, B. Zana, S. Marton, R. Varga-Kugler, M. Oldal, K. Kurucz  
601 and F. Jakab (2017). "Candidate new rotavirus species in Schreiber's bats, Serbia." *Infect Genet Evol*  
602 **48**: 19-26.
- 603 Bernhart, S. H., I. L. Hofacker, S. Will, A. R. Gruber and P. F. Stadler (2008). "RNAalifold: improved  
604 consensus structure prediction for RNA alignments." *BMC Bioinformatics* **9**: 474.
- 605 Bertrand, Y., M. Töpel, A. Elväng, W. Melik and M. Johansson (2012). "First Dating of a Recombination  
606 Event in Mammalian Tick-Borne Flaviviruses." *PLOS ONE* **7**(2): e31981.
- 607 Bertrand, Y. J. K., M. Johansson and P. Norberg (2016). "Revisiting Recombination Signal in the Tick-  
608 Borne Encephalitis Virus: A Simulation Approach." *PLOS ONE* **11**(10): e0164435.
- 609 Boni, M. F., M. D. de Jong, H. R. van Doorn and E. C. Holmes (2010). "Guidelines for identifying  
610 homologous recombination events in influenza A virus." *PLoS One* **5**(5): e10434.
- 611 Boni, M. F., G. J. D. Smith, E. C. Holmes and D. Vijaykrishna (2012). "No evidence for intra-segment  
612 recombination of 2009 H1N1 influenza virus in swine." *Gene* **494**(2): 242-245.
- 613 Boni, M. F., Y. Zhou, J. K. Taubenberger and E. C. Holmes (2008). "Homologous Recombination Is Very  
614 Rare or Absent in Human Influenza A Virus." *Journal of Virology* **82**(10): 4807.
- 615 Borodavka, A., U. Desselberger and J. T. Patton (2018). "Genome packaging in multi-segmented  
616 dsRNA viruses: distinct mechanisms with similar outcomes." *Current Opinion in Virology* **33**: 106-112.
- 617 Borodavka, A., E. C. Dykeman, W. Schimpf and D. C. Lamb (2017). "Protein-mediated RNA folding  
618 governs sequence-specific interactions between rotavirus genome segments." *Elife* **6**.

- 619 Botella, L., T. T. Tuomivirta, J. Hantula, J. J. Diez and L. Jankovsky (2015). "The European race of  
620 *Gremmeniella abietina* hosts a single species of Gammapartitivirus showing a global distribution and  
621 possible recombinant events in its history." *Fungal Biology* **119**(2): 125-135.
- 622 Bwogi, J., K. C. Jere, C. Karamagi, D. K. Byarugaba, P. Namuwulya, F. N. Baliraine, U. Desselberger and  
623 M. Iturriza-Gomara (2017). "Whole genome analysis of selected human and animal rotaviruses  
624 identified in Uganda from 2012 to 2014 reveals complex genome reassortment events between  
625 human, bovine, caprine and porcine strains." *PLoS One* **12**(6): e0178855.
- 626 Cao, D., M. Barro and Y. Hoshino (2008). "Porcine rotavirus bearing an aberrant gene stemming from  
627 an intergenic recombination of the NSP2 and NSP5 genes is defective and interfering." *Journal of*  
628 *virology* **82**(12): 6073-6077.
- 629 Carbone, I., Y. C. Liu, B. I. Hillman and M. G. Milgroom (2004). "Recombination and migration of  
630 *Cryphonectria hypovirus 1* as inferred from gene genealogies and the coalescent." *Genetics* **166**(4):  
631 1611-1629.
- 632 Carpi, G., E. C. Holmes and A. Kitchen (2010). "The Evolutionary Dynamics of Bluetongue Virus." *Journal of Molecular Evolution* **70**(6): 583-592.
- 633 Charpilienne, A., J. Lepault, F. Rey and J. Cohen (2002). "Identification of rotavirus VP6 residues  
634 located at the interface with VP2 that are essential for capsid assembly and transcriptase activity." *Journal of virology* **76**(15): 7822-7831.
- 635 Desselberger, U. (1996). "Genome rearrangements of rotaviruses." *Advances in Virus Research, Vol*  
636 *46* **46**: 69-95.
- 637 Desselberger, U. (2014). "Rotaviruses." *Virus Research* **190**: 75-96.
- 638 Donker, N. C., K. Boniface and C. D. Kirkwood (2011). "Phylogenetic analysis of rotavirus A NSP2 gene  
639 sequences and evidence of intragenic recombination." *Infect Genet Evol* **11**(7): 1602-1607.
- 640 Donker, N. C. and C. D. Kirkwood (2012). "Selection and evolutionary analysis in the nonstructural  
641 protein NSP2 of rotavirus A." *Infection Genetics and Evolution* **12**(7): 1355-1361.
- 642 Doro, R., S. L. Farkas, V. Martella and K. Banyai (2015). "Zoonotic transmission of rotavirus:  
643 surveillance and control." *Expert Review of Anti-Infective Therapy* **13**(11): 1337-1350.
- 644 Drummond, A. J. and A. Rambaut (2007). "BEAST: Bayesian evolutionary analysis by sampling trees." *BMC Evolutionary Biology* **7**(1): 214.
- 645 Edgar, R. C. (2004). "MUSCLE: multiple sequence alignment with high accuracy and high throughput." *Nucleic Acids Res* **32**(5): 1792-1797.
- 646 Esona, M. D., S. Roy, K. Rungsriruriyachai, J. Sanchez, L. Vasquez, V. Gomez, L. A. Rios, M. D. Bowen  
647 and M. Vazquez (2017). "Characterization of a triple-recombinant, reassortant rotavirus strain from  
648 the Dominican Republic." *Journal of General Virology* **98**(2): 134-142.
- 649 Fajardo, T., Jr., P. Y. Sung and P. Roy (2015). "Disruption of Specific RNA-RNA Interactions in a Double-  
650 Stranded RNA Virus Inhibits Genome Packaging and Virus Infectivity." *PLoS Pathog* **11**(12): e1005321.
- 651 Fajardo, T., P. Y. Sung, C. C. Celma and P. Roy (2017). "Rotavirus Genomic RNA Complex Forms via  
652 Specific RNA-RNA Interactions: Disruption of RNA Complex Inhibits Virus Infectivity." *Viruses* **9**(7).
- 653 Feau, N., C. Dutech, J. Brusini, D. Rigling and C. Robin (2014). "Multiple introductions and  
654 recombination in *Cryphonectria hypovirus 1*: perspective for a sustainable biological control of  
655 chestnut blight." *Evolutionary applications* **7**(5): 580-596.
- 656 Gentsch, J. R., A. R. Laird, B. Bielfelt, D. D. Griffin, K. Banyai, M. Ramachandran, V. Jain, N. A. Cunliffe,  
657 O. Nakagomi, C. D. Kirkwood, T. K. Fischer, U. D. Parashar, J. S. Bresee, B. Jiang and R. I. Glass (2005).  
658 "Serotype diversity and reassortment between human and animal rotavirus strains: implications for  
659 rotavirus vaccine programs." *J Infect Dis* **192 Suppl 1**: S146-159.



664 Ghosh, A., S. Chattopadhyay, M. Chawla-Sarkar, P. Nandy and A. Nandy (2012). "In silico study of  
665 rotavirus VP7 surface accessible conserved regions for antiviral drug/vaccine design." PLoS One **7**(7):  
666 e40749.

667 Ghosh, S. and N. Kobayashi (2011). "Whole-genomic analysis of rotavirus strains: current status and  
668 future prospects." Future Microbiology **6**(9): 1049-1065.

669 Hatcher, E. L., S. A. Zhdanov, Y. Bao, O. Blinkova, E. P. Nawrocki, Y. Ostapchuck, A. A. Schaffer and J. R.  
670 Brister (2017). "Virus Variation Resource - improved response to emergent viral outbreaks." Nucleic  
671 Acids Res **45**(D1): D482-d490.

672 He, C.-Q., L.-Y. Ma, D. Wang, G.-R. Li and N.-Z. Ding (2009). "Homologous recombination is apparent  
673 in infectious bursal disease virus." Virology **384**(1): 51-58.

674 He, C. Q., N. Z. Ding, M. He, S. N. Li, X. M. Wang, H. B. He, X. F. Liu and H. S. Guo (2010). "Intragenic  
675 recombination as a mechanism of genetic diversity in bluetongue virus." J Virol **84**(21): 11487-11495.

676 He, C. Q., G. Z. Han, D. Wang, W. Liu, G. R. Li, X. P. Liu and N. Z. Ding (2008). "Homologous  
677 recombination evidence in human and swine influenza A viruses." Virology **380**(1): 12-20.

678 Hon, C. C., T. T. Lam, C. W. Yip, R. T. Wong, M. Shi, J. Jiang, F. Zeng and F. C. Leung (2008).  
679 "Phylogenetic evidence for homologous recombination within the family Birnaviridae." J Gen Virol  
680 **89**(Pt 12): 3156-3164.

681 Hu, L., B. Sankaran, D. R. Laucirica, K. Patil, W. Salmen, A. C. M. Ferreon, P. S. Tsoi, Y. Lasanajak, D. F.  
682 Smith, S. Ramani, R. L. Atmar, M. K. Estes, J. C. Ferreon and B. V. V. Prasad (2018). "Glycan recognition  
683 in globally dominant human rotaviruses." Nat Commun **9**(1): 2631.

684 Hua, J., X. Chen and J. T. Patton (1994). "Deletion mapping of the rotavirus metalloprotein NS53  
685 (NSP1): the conserved cysteine-rich region is essential for virus-specific RNA binding." J Virol **68**(6):  
686 3990-4000.

687 Huang, P., M. Xia, M. Tan, W. Zhong, C. Wei, L. Wang, A. Morrow and X. Jiang (2012). "Spike protein  
688 VP8\* of human rotavirus recognizes histo-blood group antigens in a type-specific manner." J Virol  
689 **86**(9): 4833-4843.

690 Husain, M., P. Seth, L. Dar and S. Broor (1996). "Classification of rotavirus into G and P types with  
691 specimens from children with acute diarrhea in New Delhi, India." Journal of Clinical Microbiology  
692 **34**(6): 1592.

693 Iturriza-Gomara, M., B. Isherwood, U. Desselberger and J. Gray (2001). "Reassortment in vivo: driving  
694 force for diversity of human rotavirus strains isolated in the United Kingdom between 1995 and  
695 1999." J Virol **75**(8): 3696-3705.

696 Jackwood, D. J. (2012). "Molecular epidemiologic evidence of homologous recombination in  
697 infectious bursal disease viruses." Avian Dis **56**(3): 574-577.

698 Jain, V., B. K. Das, M. K. Bhan, R. I. Glass and J. R. Gentsch (2001). "Great diversity of group A rotavirus  
699 strains and high prevalence of mixed rotavirus infections in India." J Clin Microbiol **39**(10): 3524-3529.

700 Jere, K. C., C. Chaguza, N. Bar-Zeev, J. Lowe, C. Peno, B. Kumwenda, O. Nakagomi, J. E. Tate, U. D.  
701 Parashar, R. S. Heyderman, N. French, N. A. Cunliffe, M. Iturriza-Gomara and V. Consortium (2018).  
702 "Emergence of Double- and Triple-Gene Reassortant G1P 8 Rotaviruses Possessing a DS-1-Like  
703 Backbone after Rotavirus Vaccine Introduction in Malawi." Journal of Virology **92**(3).

704 Jere, K. C., L. Mlera, N. A. Page, A. A. van Dijk and H. G. O'Neill (2011). "Whole genome analysis of  
705 multiple rotavirus strains from a single stool specimen using sequence-independent amplification and  
706 454(R) pyrosequencing reveals evidence of intergenotype genome segment recombination." Infect  
707 Genet Evol **11**(8): 2072-2082.



708 Jiang, B., H. Tsunemitsu, J. R. Gentsch, R. I. Glass, K. Y. Green, Y. Qian and L. J. Saif (1992). "Nucleotide  
709 sequence of gene 5 encoding the inner capsid protein (VP6) of bovine group C rotavirus: comparison  
710 with corresponding genes of group C, A, and B rotaviruses." *Virology* **190**(1): 542-547.  
711 Jing, Z., X. Zhang, H. Shi, J. Chen, D. Shi, H. Dong and L. Feng (2018). "A G3P 13 porcine group A  
712 rotavirus emerging in China is a reassortant and a natural recombinant in the VP4 gene."  
713 *Transboundary and Emerging Diseases* **65**(2): e317-e328.  
714 Khetawat, D., P. Dutta, S. K. Bhattacharya and S. Chakrabarti (2002). "Distribution of rotavirus VP7  
715 genotypes among children suffering from watery diarrhea in Kolkata, India." *Virus Res* **87**(1): 31-40.  
716 Kirkwood, C. D. (2010). "Genetic and antigenic diversity of human rotaviruses: potential impact on  
717 vaccination programs." *Journal of Infectious Diseases* **202**: S43-S48.  
718 Kiulia, N. M., I. Peenze, J. Dewar, A. Nyachio, M. Galo, E. Omolo, A. D. Steele and J. M. Mwenda  
719 (2006). "Molecular characterisation of the rotavirus strains prevalent in Maua, Meru North, Kenya."  
720 *East Afr Med J* **83**(7): 360-365.  
721 Lai, M. M. (1992). "RNA recombination in animal and plant viruses." *Microbiol Rev* **56**(1): 61-79.  
722 Lee, B., D. M. Dickson, A. C. deCamp, E. Ross Colgate, S. A. Diehl, M. I. Uddin, S. Sharmin, S. Islam, T. R.  
723 Bhuiyan, M. Alam, U. Nayak, J. C. Mychaleckyj, M. Taniuchi, W. A. Petri, Jr., R. Haque, F. Qadri and B.  
724 D. Kirkpatrick (2018). "Histo-Blood Group Antigen Phenotype Determines Susceptibility to Genotype-  
725 Specific Rotavirus Infections and Impacts Measures of Rotavirus Vaccine Efficacy." *J Infect Dis* **217**(9):  
726 1399-1407.  
727 Li, W., E. Manktelow, J. C. von Kirchbach, J. R. Gog, U. Desselberger and A. M. Lever (2010). "Genomic  
728 analysis of codon, sequence and structural conservation with selective biochemical-structure  
729 mapping reveals highly conserved and dynamic structures in rotavirus RNAs with potential cis-acting  
730 functions." *Nucleic Acids Res* **38**(21): 7718-7735.  
731 Li, Y., Z. Xia, J. Peng, T. Zhou and Z. Fan (2013). "Evidence of recombination and genetic diversity in  
732 southern rice black-streaked dwarf virus." *Arch Virol* **158**(10): 2147-2151.  
733 Linder-Basso, D., J. N. Dynek and B. I. Hillman (2005). "Genome analysis of Cryphonectria hypovirus 4,  
734 the most common hypovirus species in North America." *Virology* **337**(1): 192-203.  
735 Lorenz, R., S. H. Bernhart, C. Honer Zu Siederdisen, H. Tafer, C. Flamm, P. F. Stadler and I. L. Hofacker  
736 (2011). "ViennaRNA Package 2.0." *Algorithms Mol Biol* **6**: 26.  
737 Ludert, J. E., M. C. Ruiz, C. Hidalgo and F. Liprandi (2002). "Antibodies to rotavirus outer capsid  
738 glycoprotein VP7 neutralize infectivity by inhibiting virion decapsulation." *J Virol* **76**(13): 6643-6651.  
739 Lukashov, A. N. (2005). "Role of recombination in evolution of enteroviruses." *Rev Med Virol* **15**(3):  
740 157-167.  
741 Martella, V., K. Banyai, J. Matthijnsens, C. Buonavoglia and M. Ciarlet (2010). "Zoonotic aspects of  
742 rotaviruses." *Veterinary Microbiology* **140**(3-4): 246-255.  
743 Martella, V., M. Ciarlet, A. Pratelli, S. Arista, V. Terio, G. Elia, A. Cavalli, M. Gentile, N. Decaro, G.  
744 Greco, M. A. Cafiero, M. Tempesta and C. Buonavoglia (2003). "Molecular analysis of the VP7, VP4,  
745 VP6, NSP4, and NSP5/6 genes of a buffalo rotavirus strain: identification of the rare P[3] rhesus  
746 rotavirus-like VP4 gene allele." *Journal of clinical microbiology* **41**(12): 5665-5675.  
747 Martin, D. P., B. Murrell, M. Golden, A. Khoosal and B. Muhire (2015). "RDP4: Detection and analysis  
748 of recombination patterns in virus genomes." *Virus Evol* **1**(1): vev003.  
749 Martinez-Laso, J., A. Roman, M. Rodriguez, I. Cervera, J. Head, I. Rodriguez-Avial and J. J. Picazo  
750 (2009). "Diversity of the G3 genes of human rotaviruses in isolates from Spain from 2004 to 2006:  
751 cross-species transmission and inter-genotype recombination generates alleles." *J Gen Virol* **90**(Pt 4):  
752 935-943.

753 Matthijssens, J., J. Bilcke, M. Ciarlet, V. Martella, K. Banyai, M. Rahman, M. Zeller, P. Beutels, P. Van  
754 Damme and M. Van Rans (2009). "Rotavirus disease and vaccination: impact on genotype diversity."  
755 Future Microbiology **4**(10): 1303-1316.

756 Matthijssens, J., M. Ciarlet, E. Heiman, I. Arijs, T. Delbeke, S. M. McDonald, E. A. Palombo, M.  
757 Iturriza-Gomara, P. Maes, J. T. Patton, M. Rahman and M. Van Ranst (2008). "Full genome-based  
758 classification of rotaviruses reveals a common origin between human Wa-Like and porcine rotavirus  
759 strains and human DS-1-like and bovine rotavirus strains." J Virol **82**(7): 3204-3219.

760 Matthijssens, J., M. Ciarlet, S. M. McDonald, H. Attoui, K. Banyai, J. R. Brister, J. Buesa, M. D. Esona,  
761 M. K. Estes, J. R. Gentsch, M. Iturriza-Gómara, R. Johne, C. D. Kirkwood, V. Martella, P. P. C. Mertens,  
762 O. Nakagomi, V. Parreño, M. Rahman, F. M. Ruggeri, L. J. Saif, N. Santos, A. Steyer, K. Taniguchi, J. T.  
763 Patton, U. Desselberger and M. Van Ranst (2011). "Uniformity of rotavirus strain nomenclature  
764 proposed by the Rotavirus Classification Working Group (RCWG)." Archives of Virology **156**(8): 1397-  
765 1413.

766 Matthijssens, J., M. Ciarlet, M. Rahman, H. Attoui, K. Banyai, M. K. Estes, J. R. Gentsch, M. Iturriza-  
767 Gómara, C. D. Kirkwood, V. Martella, P. P. C. Mertens, O. Nakagomi, J. T. Patton, F. M. Ruggeri, L. J.  
768 Saif, N. Santos, A. Steyer, K. Taniguchi, U. Desselberger and M. Van Ranst (2008). "Recommendations  
769 for the classification of group A rotaviruses using all 11 genomic RNA segments." Archives of virology  
770 **153**(8): 1621-1629.

771 Matthijssens, J., E. Heylen, M. Zeller, M. Rahman, P. Lemey and M. Van Ranst (2010). "Phylogenetic  
772 Analyses of Rotavirus Genotypes G9 and G12 Underscore Their Potential for Swift Global Spread."  
773 Molecular Biology and Evolution **27**(10): 2431-2436.

774 Matthijssens, J., P. H. Otto, M. Ciarlet, U. Desselberger, M. Van Ranst and R. Johne (2012). "VP6-  
775 sequence-based cutoff values as a criterion for rotavirus species demarcation." Archives of Virology  
776 **157**(6): 1177-1182.

777 McDonald, S. M., J. Matthijssens, J. K. McAllen, E. Hine, L. Overton, S. Wang, P. Lemey, M. Zeller, M.  
778 Van Ranst, D. J. Spiro and J. T. Patton (2009). "Evolutionary dynamics of human rotaviruses: balancing  
779 reassortment with preferred genome constellations." PLOS Pathogens **5**(10): e1000634.

780 McDonald, S. M., M. I. Nelson, P. E. Turner and J. T. Patton (2016). "Reassortment in segmented RNA  
781 viruses: mechanisms and outcomes." Nature Reviews Microbiology **14**(7): 448-460.

782 McDonald, S. M. and J. T. Patton (2011). "Assortment and packaging of the segmented rotavirus  
783 genome." Trends Microbiol **19**(3): 136-144.

784 Mihalov-Kovacs, E., A. Gellert, S. Marton, S. L. Farkas, E. Feher, M. Oldal, F. Jakab, V. Martella and K.  
785 Banyai (2015). "Candidate new rotavirus species in sheltered dogs, Hungary." Emerg Infect Dis **21**(4):  
786 660-663.

787 Minin, V. N., E. W. Bloomquist and M. A. Suchard (2008). "Smooth skyride through a rough skyline:  
788 Bayesian coalescent-based inference of population dynamics." Mol Biol Evol **25**(7): 1459-1471.

789 Mwangi, M., C. A. Nyaigoti, R. Njeru, D. J. Nokes, C. Matthew, V. T. M. Phan and E. C. Holmes (2018).  
790 "Unbiased whole genome deep sequencing of Rotavirus Group A positive samples from rural Kenya,  
791 2012-14 reveals high frequency of coinfection and genetic reassortment." International Journal of  
792 Infectious Diseases **73**: 203.

793 Mwenda, J. M., K. M. Ntoto, A. Abebe, C. Enweronu-Laryea, I. Amina, J. McHomvu, A. Kisakye, E. M.  
794 Mpabalwani, I. Pazvakavambwa, G. E. Armah, L. M. Seheri, N. M. Kiulia, N. Page, M.-A. Widdowson  
795 and A. Duncan Steele (2010). "Burden and Epidemiology of Rotavirus Diarrhea in Selected African  
796 Countries: Preliminary Results from the African Rotavirus Surveillance Network." The Journal of  
797 Infectious Diseases **202**(Supplement\_1): S5-S11.

798 Nair, N., N. Feng, L. K. Blum, M. Sanyal, S. Ding, B. Jiang, A. Sen, J. M. Morton, X. S. He, W. H. Robinson  
799 and H. B. Greenberg (2017). "VP4- and VP7-specific antibodies mediate heterotypic immunity to  
800 rotavirus in humans." Sci Transl Med **9**(395).

801 Ngoveni, H. G., A. van Schalkwyk and J. J. O. Koekemoer (2019). "Evidence of Intragenic  
802 Recombination in African Horse Sickness Virus." Viruses **11**(7).

803 Norberg, P., A. Roth and T. Bergstrom (2013). "Genetic recombination of tick-borne flaviviruses  
804 among wild-type strains." Virology **440**(2): 105-116.

805 Parez, N., A. Garbarg-Chenon, C. Fourgeux, F. Le Deist, A. Servant-Delmas, A. Charpilienne, J. Cohen  
806 and I. Schwartz-Cornil (2004). "The VP6 protein of rotavirus interacts with a large fraction of human  
807 naive B cells via surface immunoglobulins." J Virol **78**(22): 12489-12496.

808 Parra, G. I., K. Bok, M. Martinez and J. A. Gomez (2004). "Evidence of rotavirus intragenic  
809 recombination between two sublineages of the same genotype." J Gen Virol **85**(Pt 6): 1713-1716.

810 Patton, J. T. (2012). "Rotavirus diversity and evolution in the post-vaccine world." Discovery Medicine  
811 **13**(68): 85-97.

812 Patton, J. T., R. Vasquez-Del Carprio, M. A. Tortorici and Z. F. Taraporewala (2007). "Coupling of  
813 rotavirus genome replication and capsid assembly." Adv Virus Res **69**: 167-201.

814 Pérez-Losada, M., M. Arenas, J. C. Galán, F. Palero and F. González-Candelas (2015). "Recombination  
815 in viruses: Mechanisms, methods of study, and evolutionary consequences." Infection, Genetics and  
816 Evolution **30**: 296-307.

817 Phan, T. G., S. Okitsu, N. Maneekarn and H. Ushijima (2007). "Evidence of intragenic recombination in  
818 G1 rotavirus VP7 genes." J Virol **81**(18): 10188-10194.

819 Phan, T. G., S. Okitsu, N. Maneekarn and H. Ushijima (2007). "Genetic heterogeneity, evolution and  
820 recombination in emerging G9 rotaviruses." Infection Genetics and Evolution **7**(5): 656-663.

821 Rahman, M., J. Matthijssens, X. Yang, T. Delbeke, I. Arijs, K. Taniguchi, M. Iturriza-Gomara, N.  
822 Iftekharruddin, T. Azim and M. Van Ranst (2007). "Evolutionary history and global spread of the  
823 emerging G12 human rotaviruses." Journal of Virology **81**(5): 2382-2390.

824 Rambaut, A. (2019). "Figtree v1.4.4."

825 Rambaut, A., A. J. Drummond, D. Xie, G. Baele and M. A. Suchard (2018). "Posterior Summarization in  
826 Bayesian Phylogenetics Using Tracer 1.7." Systematic Biology **67**(5): 901-904.

827 Ramig, R. F. (1997). "Genetics of the rotaviruses." Annual Review of Microbiology **51**: 225-255.

828 Ramig, R. F. and R. L. Ward (1991). "Genomic segment reassortment in rotaviruses and other  
829 reoviridae." Advances in Virus Research **39**: 163-207.

830 Rojas, M., H. G. Dias, J. L. S. Gonçalves, A. Manchego, R. Rosadio, D. Pezo and N. Santos (2019).  
831 "Genetic diversity and zoonotic potential of rotavirus A strains in the southern Andean highlands,  
832 Peru." Transboundary and Emerging Diseases **0**(0).

833 Roy, A., A. Kucukural and Y. Zhang (2010). "I-TASSER: a unified platform for automated protein  
834 structure and function prediction." Nat Protoc **5**(4): 725-738.

835 Sadiq, A., N. Bostan, K. C. Yinda, S. Naseem and S. Sattar (2018). "Rotavirus: Genetics, pathogenesis  
836 and vaccine advances." Reviews in Medical Virology **28**(6).

837 Sánchez-Fauquier, A., V. Montero, S. Moreno, M. Solé, J. Colomina, M. Iturriza-Gomara, A. Revilla, I.  
838 Wilhelmi, J. Gray and V.-N. G. Gegavi (2006). "Human rotavirus G9 and G3 as major cause of diarrhea  
839 in hospitalized children, Spain." Emerging infectious diseases **12**(10): 1536-1541.

840 Santiana, M., S. Ghosh, B. A. Ho, V. Rajasekaran, W. L. Du, Y. Mutsafi, D. A. De Jesus-Diaz, S. V.  
841 Sosnovtsev, E. A. Levenson, G. I. Parra, P. M. Takvorian, A. Cali, C. Bleck, A. N. Vlasova, L. J. Saif, J. T.  
842 Patton, P. Lopalco, A. Corcelli, K. Y. Green and N. Altan-Bonnet (2018). "Vesicle-Cloaked Virus Clusters  
843 Are Optimal Units for Inter-organismal Viral Transmission." Cell Host Microbe **24**(2): 208-220.e208.

- 844 Schumann, T., H. Hotzel, P. Otto and R. Johne (2009). "Evidence of interspecies transmission and  
845 reassortment among avian group A rotaviruses." *Virology* **386**(2): 334-343.
- 846 Simon-Loriere, E. and E. C. Holmes (2011). "Why do RNA viruses recombine?" *Nature Reviews*  
847 *Microbiology* **9**(8): 617-626.
- 848 Steger, C. L., C. E. Boudreaux, L. E. LaConte, J. B. Pease and S. M. McDonald (2019). "Group A  
849 Rotavirus VP1 Polymerase and VP2 Core Shell Proteins: Intergenotypic Sequence Variation and  
850 *In Vitro* Functional Compatibility." *Journal of Virology* **93**(2): e01642-01618.
- 851 Suchard, M. A., P. Lemey, G. Baele, D. L. Ayres, A. J. Drummond and A. Rambaut (2018). "Bayesian  
852 phylogenetic and phylodynamic data integration using BEAST 1.10." *Virus Evol* **4**(1): vey016.
- 853 Suzuki, Y. (2015). "A candidate packaging signal of human rotavirus differentiating Wa-like and DS-1-  
854 like genomic constellations." *Microbiol Immunol* **59**(9): 567-571.
- 855 Suzuki, Y., T. Gojobori and O. Nakagomi (1998). "Intragenic recombinations in rotaviruses." *FEBS Lett*  
856 **427**(2): 183-187.
- 857 Tang, B., J. M. Gilbert, S. M. Matsui and H. B. Greenberg (1997). "Comparison of the rotavirus gene 6  
858 from different species by sequence analysis and localization of subgroup-specific epitopes using site-  
859 directed mutagenesis." *Virology* **237**(1): 89-96.
- 860 Tolskaya, E. A., L. I. Romanova, V. M. Blinov, E. G. Viktorova, A. N. Sinyakov, M. S. Kolesnikova and V. I.  
861 Agol (1987). "Studies on the recombination between RNA genomes of poliovirus: the primary  
862 structure and nonrandom distribution of crossover regions in the genomes of intertypic poliovirus  
863 recombinants." *Virology* **161**(1): 54-61.
- 864 Varsani, A., P. Lefevre, P. Roumagnac and D. Martin (2018). "Notes on recombination and  
865 reassortment in multipartite/segmented viruses." *Curr Opin Virol* **33**: 156-166.
- 866 Vita, R., S. Mahajan, J. A. Overton, S. K. Dhanda, S. Martini, J. R. Cantrell, D. K. Wheeler, A. Sette and  
867 B. Peters (2019). "The Immune Epitope Database (IEDB): 2018 update." *Nucleic Acids Res* **47**(D1):  
868 D339-d343.
- 869 Voth, P. D., L. Mairura, B. E. Lockhart and G. May (2006). "Phylogeography of Ustilago maydis virus H1  
870 in the USA and Mexico." *Journal of General Virology* **87**(11): 3433-3441.
- 871 Vukea, P. R., S. Willows-Munro, R. F. Horner and T. H. T. Coetzer (2014). "Phylogenetic analysis of the  
872 polyprotein coding region of an infectious South African bursal disease virus (IBDV) strain." *Infection,  
873 Genetics and Evolution* **21**: 279-286.
- 874 Woods, R. J. (2015). "Intrasegmental recombination does not contribute to the long-term evolution of  
875 group A rotavirus." *Infection Genetics and Evolution* **32**: 354-360.
- 876 Worobey, M., A. Rambaut, O. G. Pybus and D. L. Robertson (2002). "Questioning the evidence for  
877 genetic recombination in the 1918 "Spanish flu" virus." *Science* **296**(5566): 211 discussion 211.
- 878 Yang, J. and Y. Zhang (2015). "Protein Structure and Function Prediction Using I-TASSER." *Curr Protoc*  
879 *Bioinformatics* **52**: 5 8 1-15.
- 880 Yao, B., L. Zhang, S. Liang and C. Zhang (2012). "SVMTriP: a method to predict antigenic epitopes  
881 using support vector machine to integrate tri-peptide similarity and propensity." *PLoS One* **7**(9):  
882 e45152.
- 883 Yin, X., F. Q. Zheng, W. Tang, Q. Q. Zhu, X. D. Li, G. M. Zhang, H. T. Liu and B. S. Liu (2013). "Genetic  
884 structure of rice black-streaked dwarf virus populations in China." *Arch Virol* **158**(12): 2505-2515.
- 885 Yoder, J. D. and P. R. Dormitzer (2006). "Alternative intermolecular contacts underlie the rotavirus  
886 VP5\* two- to three-fold rearrangement." *The EMBO journal* **25**(7): 1559-1568.
- 887 Zeldovich, K. B., P. Liu, N. Renzette, M. Foll, S. T. Pham, S. V. Venev, G. R. Gallagher, D. N. Bolon, E. A.  
888 Kurt-Jones, J. D. Jensen, D. R. Caffrey, C. A. Schiffer, T. F. Kowalik, J. P. Wang and R. W. Finberg (2015).



889 "Positive Selection Drives Preferred Segment Combinations during Influenza Virus Reassortment."  
 890 *Mol Biol Evol* **32**(6): 1519-1532.

891 Zhang, Y. (2008). "I-TASSER server for protein 3D structure prediction." *BMC Bioinformatics* **9**: 40.

892 Zhou, Y. J., J. W. Burns, Y. Morita, T. Tanaka and M. K. Estes (1994). "Localization of rotavirus VP4  
 893 neutralization epitopes involved in antibody-induced conformational changes of virus structure." *J*  
 894 *Virology* **68**(6): 3955-3964.

895

896

897 **SUPPLEMENTARY INFORMATION**

898 **Supplementary Table 1. Putative recombination events identified by RDP4 for whole genome**  
 899 **Rotavirus A sequences. A total of 117 events were identified by at least 6/7 RDP4 programs. Shaded**  
 900 **rows indicate strongly supported events (identified by 7/7 RDP4 programs or found in multiple**  
 901 **sequenced isolates). Events that were flagged by RDP4, but were not strongly supported are not listed**  
 902 **here.**

| Segment | Accession Number                                  | Breakpoint Cis (Excluding Gaps)     | p-Values                                                                                                                          | Representative Major Parent Sequence, Source Species, Year of Isolation, % ANI, Genogroup | Representative Minor Parent Sequence, Source Species, Year of Isolation, % ANI, Genogroup |
|---------|---------------------------------------------------|-------------------------------------|-----------------------------------------------------------------------------------------------------------------------------------|-------------------------------------------------------------------------------------------|-------------------------------------------------------------------------------------------|
| VP1     | JQ988899, <i>Homo sapiens</i> , Croatia, 2006     | 970 (781-986) - 1734 (1693-1751)    | RDP 1.02E-43<br>GENECONV 8.72E-48<br>BootScan 4.17E-32<br>MaxChi 1.15E-17<br>Chimera 1.05E-17<br>SiScan 4.30E-19<br>3Seq 2.96E-09 | KX632342, <i>Homo sapiens</i> , Uganda, 93.7%, R1                                         | GQ414540, <i>Homo sapiens</i> , Germany, 2009, 98.7%, R2                                  |
| VP1     | KU739903, <i>Sus scrofa</i> , Taiwan, 2015        | 1-(747-805)                         | RDP 1.19E-24<br>GENECONV 1.41E-21<br>BootScan 5.14E-21<br>MaxChi 8.41E-16<br>Chimera 3.57E-16<br>SiScan 9.64E-16<br>3Seq 2.83E-09 | KU739900, <i>Sus scrofa</i> , Taiwan, 2015, 95.8%, R1                                     | KU739904, <i>Sus scrofa</i> , Taiwan, 2015, 99.1%, R1                                     |
| VP1     | KF812721, <i>Homo sapiens</i> , South Korea, 2010 | 2504 (2464-2537) - 3268 (3232-116)  | RDP 2.58E-22<br>GENECONV 2.12E-08<br>BootScan 4.71E-22<br>MaxChi 9.96E-16<br>Chimera 1.47E-13<br>SiScan 5.10E-09<br>3Seq 2.05E-02 | JX027681, <i>Homo sapiens</i> , Australia, 2007, 98.1%, R1                                | JF796734, <i>Sus scrofa</i> , South Korea, 2006, 94.6%, R1                                |
| VP1     | JQ069926, <i>Homo sapiens</i> , Canada, 2008      | 2498 (2356-2507) - 3268             | RDP 9.14E-22<br>GENECONV 5.71E-19<br>BootScan 1.00E-18<br>MaxChi 1.30E-15<br>Chimera 2.51E-15<br>SiScan 7.42E-23<br>3Seq 2.78E-25 | JX195074, <i>Homo sapiens</i> , Italy, 2010, 98.1%, R1                                    | JX027681, <i>Homo sapiens</i> , Australia, 2007, 99.6%, R1                                |
| VP1     | KM454503, <i>Equus caballus</i> , USA, 1981       | 840 (802-951) - 3281                | RDP 2.77E-15<br>GENECONV 1.36E-19<br>BootScan 4.79 E-21<br>MaxChi 1.55E-17<br>SiScan 1.27E-40<br>3Seq 8.22E-05                    | Unknown, closest = DQ838638, unknown, R2                                                  | KM454492, <i>Equus caballus</i> , United Kingdom, 1976, 99.1%, R2                         |
| VP1     | KU714444, <i>Homo sapiens</i> , Malawi, 2000      | 1656 (1636-1673) - 1752 (1740-1766) | RDP 1.35E-18<br>GENECONV 1.25E-17<br>BootScan 3.76E-11<br>MaxChi 3.81E-02<br>Chimera 4.33E-02<br>3Seq 5.67E-09                    | JN706454, <i>Homo sapiens</i> , Thailand, 2009, 97.4%, R1                                 | KX655451, <i>Homo sapiens</i> , Uganda, 2013, 97.9%, R2                                   |
| VP1     | JQ069936, <i>Homo sapiens</i> , Canada, 2009      | 1670 (1531-1703) - 2419 (2308-2436) | RDP 1.83E-14<br>GENECONV 7.68E-13<br>MaxChi 2.73E-08                                                                              | KU248405, <i>Homo sapiens</i> , Bangladesh, 2010, 98.7%, R2                               | HQ657171, <i>Homo sapiens</i> , South Africa, 2009, 99.7%, R2                             |

|     |                                                    |                                    |                                                                                                                                    |                                                                     |                                                                    |
|-----|----------------------------------------------------|------------------------------------|------------------------------------------------------------------------------------------------------------------------------------|---------------------------------------------------------------------|--------------------------------------------------------------------|
|     |                                                    |                                    | Chimera 2.48E-08<br>SiScan 2.65E-08<br>3Seq 5.15E-19                                                                               |                                                                     |                                                                    |
| VP1 | KU739903, <i>Sus scrofa</i> , Taiwan, 2015         | 1543 (138-1588) - 2220 (2160-2260) | RDP 3.06E-13<br>GENECONV 6.19E-04<br>BootScan 9.40E-11<br>MaxChi 2.98E-08<br>Chimera 5.67E-08<br>SiScan 1.19 E-06<br>3Seq 2.83E-09 | KU739900, <i>Sus scrofa</i> , Taiwan, 2015, 97.8%, R1               | KU739904, <i>Sus scrofa</i> , Taiwan, 2015, 96.5%, R1              |
| VP1 | JQ988899, <i>Homo sapiens</i> , Croatia, 2006      | 222 (3094-362) - 969 (882-NA)      | RDP 3.76E-12<br>GENECONV 4.88E-10<br>MaxChi 7.74E-09<br>Chimera 4.5E-07<br>SiScan 6.32E-14<br>3Seq 5.64E-09                        | KJ559215, <i>Homo sapiens</i> , Argentina, 1998, 96.8%, R1          | Unknown, closest = JX195074, <i>Homo sapiens</i> , Italy, 2010, R1 |
| VP1 | KC580176, <i>Homo sapiens</i> , USA, 1988          | 1471 (1328-1521) - 3270            | RDP 9.77E-12<br>GENECONV 3.81E-08<br>MaxChi 6.16E-12<br>Chimera 2.36E-04<br>SiScan 7.42E-23<br>3Seq 1.91E-20                       | KC580526, <i>Homo sapiens</i> , USA, 1979, 99%, R1                  | KC580601, <i>Homo sapiens</i> , USA, 1988, 100%, R1                |
| VP1 | JQ069918, <i>Homo sapiens</i> , Canada, 2008       | 604 (541-662) - 956 (889-1068)     | RDP 2.42E-10<br>GENECONV 3.25E-08<br>BootScan 2.38E-09<br>MaxChi 5.62E-03<br>Chimera 5.62E-03<br>SiScan 1.10E-04<br>3Seq 1.13E-08  | KJ751834, <i>Homo sapiens</i> , South Africa, 2009, 99.5%, R1       | JQ069924, <i>Homo sapiens</i> , Canada, 2008, 99.7%, R1            |
| VP1 | KC579647, <i>Homo sapiens</i> , USA, 1988          | 35 – 1448 (1290-1498)              | GENECONV 4.30E-04<br>BootScan 2.63E-05<br>MaxChi 2.34E-09<br>Chimera 1.41E-08<br>SiScan 6.55E-11<br>3Seq 4.34E-19                  | KC580601, <i>Homo sapiens</i> , USA, 1988, 100%, R1                 | KC579509, <i>Homo sapiens</i> , USA, 1989, 99.4%, R1               |
| VP1 | KU199270, <i>Homo sapiens</i> , Bangladesh, 2010   | 670 (541-711) - 1403 (1327-1445)   | Flagged for 285 sequences,<br>p-value = 3.33E-09                                                                                   | KX536654, <i>Homo sapiens</i> , India, 2011, 98.6%, R2              | KU356640, <i>Homo sapiens</i> , Bangladesh, 2013, 100%, R2         |
| VP1 | KU356662, KU356640, <i>Homo sapiens</i> , 2013     | 656 (541-711) - 2661 (2600-2735)   | RDP 5.87E-08<br>GENECONV 1.43E-04<br>MaxChi 9.02E-10<br>SiScan 6.71E-20<br>3Seq 6.88 E-23                                          | KU356607, <i>Homo sapiens</i> , Bangladesh, 2013, 99.5%, R2         | KC178768, <i>Homo sapiens</i> , Italy, 2007, 99.6%, R2             |
| VP1 | KU199270, <i>Homo sapiens</i> , Bangladesh, 2010   | 3282 (3116-50) - 1410 (1363-1478)  | GENECONV 3.94E-06<br>BootScan 2.03E-04<br>MaxChi 1.20E-09<br>Chimera 3.36E-10<br>SiScan 2.57E-09<br>3Seq 5.81E-18                  | JQ069920, <i>Homo sapiens</i> , Canada, 2008, 99.5%, R2             | KJ751889, <i>Homo sapiens</i> , Ethiopia, 2009, 99.1%, R2          |
| VP2 | KJ753425, <i>Homo sapiens</i> , Uganda, 2011       | 599 (561-623) - 991 (967-1019)     | RDP 6.28E-47<br>GENECONV 5.13E-45<br>BootScan 2.53E-44<br>MaxChi 5.39E-12<br>Chimera 6.10E-12<br>SiScan 8.38E-15<br>3Seq 1.96E-09  | JF490148, <i>Homo sapiens</i> , Australia, 2004, 98.3%, C1          | KP752972, <i>Homo sapiens</i> , Gambia, 2008, 99.7%, C2            |
| VP2 | KU714445, <i>Homo sapiens</i> , Malawi, 2000       | 1155(1139-1170) - 1887 (1862-1908) | RDP 2.37E-41<br>GENECONV 1.62E-33<br>BootScan 5.28E-39<br>MaxChi 1.26E-16<br>Chimera 1.42E-16<br>SiScan 8.61E-25<br>3Seq 1.96E-09  | KP752983, <i>Homo sapiens</i> , South Africa, 2009, 94.3%, C1       | KU714456, <i>Homo sapiens</i> , Malawi, 2000, 99.9%, C2            |
| VP2 | KX655439, <i>Homo sapiens</i> , Uganda, 2013       | 2713 (2672-2717) - 158 (143-171)   | RDP 1.34E-25<br>GENECONV 9.67E-24<br>MaxChi 1.54E-03<br>Chimera 8.56E-04<br>SiScan 1.61E-05<br>3S— 2.15E--08                       | Unknown, closest = KX632343, <i>Homo sapiens</i> , Uganda, 2013, C2 | MG181349, <i>Homo sapiens</i> , Malawi, 2002, 99.4%, C1            |
| VP2 | KJ753617, <i>Homo sapiens</i> , South Africa, 2004 | 548 (464-560) - 784 (754-842)      | RDP 5.31E-27<br>GENECONV 4.03E-24<br>BootScan 7.13E-23                                                                             | KJ752329, <i>Homo sapiens</i> , South Africa, 2003, 99.4%, C1       | KX655439, <i>Homo sapiens</i> , Uganda, 2013, 98.4%, C2            |



|     |                                                                           |                                     |                                                                                                                                    |                                                                      |                                                                             |
|-----|---------------------------------------------------------------------------|-------------------------------------|------------------------------------------------------------------------------------------------------------------------------------|----------------------------------------------------------------------|-----------------------------------------------------------------------------|
|     |                                                                           |                                     | MaxChi 3.85E-05<br>Chimera 4.51E-05<br>3Seq 1.96E-09                                                                               |                                                                      |                                                                             |
| VP2 | HM988959, <i>Bos taurus</i> , South Korea, Unknown                        | 558 (524-586) - 2685                | RDP 1.14E-21<br>GENECONV 2.68E-25<br>BootScan 2.00 E-21<br>MaxChi 1.29E-05<br>Chimera 1.11E-03<br>SiScan 3.88E-15<br>3Seq 5.94E-21 | JQ069842, <i>Homo sapiens</i> , Canada, 2008, 95.2%, C1              | JX971570, <i>Bos taurus</i> , South Korea, 2004, 100%, C1                   |
| VP2 | MG181591, <i>Homo sapiens</i> , Malawi, 2013                              | 1129 (1106-1140) - 1299 (1292-1318) | RDP 3.47 E-21<br>GENECONV 2.01E-19<br>BootScan 4.15E-15<br>MaxChi 4.04E-03<br>Chimera 3.95E-03<br>3Seq 1.96E-09                    | KJ753828, <i>Homo sapiens</i> , Zimbabwe, unknown, 99.1%, C2         | KJ753425, <i>Homo sapiens</i> , Uganda, 2011, 99.4%, C1                     |
| VP2 | KX632343, <i>Homo sapiens</i> , Uganda, 2013                              | 2666 (2614-39) - 593 (560-612)      | RDP 9.89E-21<br>GENECONV 2.26 E-17<br>BootScan 5.20E-19<br>MaxChi 4.65E-13<br>Chimera 3.18 E-13<br>SiSeq 2.53E-24<br>3Seq 1.37E-05 | JN258812, <i>Homo sapiens</i> , Belgium, 2000, 91.7%, C1             | KJ753402, <i>Homo sapiens</i> , South Africa, 2005, 99.5%, C2               |
| VP2 | KX632343, <i>Homo sapiens</i> , Uganda, 2013                              | 1357 (1322-1368) - 1808 (1790-1830) | RDP 1.14E-21<br>GENECONV 3.44E-17<br>MaxChi 1.69E-11<br>Chimera 3.57E-10<br>SiScan 2.84E-14<br>3Seq 1.96E-09                       | MG181371, <i>Homo sapiens</i> , Malawi, 2002, 95.3%, C1              | KJ870879, <i>Homo sapiens</i> , Democratic Republic of the Congo, 99.3%, C2 |
| VP2 | KY055428, <i>Capra aegagrus</i> , Uganda, 2014                            | 983 (960-1009) - 1238 (1194-1243)   | RDP 1.64E-18<br>GENECONV 1.12E-16<br>BootScan 2.13E-10<br>MaxChi 1.67E-05<br>Chimera 4.73E-04<br>SiScan 4.35E-05<br>3Seq 1.96E-09  | JN831232, <i>Bos taurus</i> , South Africa, 2007, 94.7%, C2          | KF636257, <i>Bos taurus</i> , South Africa, 2007, 99.6%, C2                 |
| VP2 | KJ870901, <i>Homo sapiens</i> , Democratic Republic of the Congo, Unknown | 2330 (2304-2359) - 2648 (2589-1)    | RDP 1.96E-18<br>GENECONV 2.99E-16<br>BootScan 5.51E-16<br>MaxChi 1.71E-03<br>Chimera 7.67E-04<br>SiScan 6.29E-06<br>3Seq 1.96E-09  | KY055417, <i>Sus scrofa</i> , Uganda, 2016, 95%, C1                  | LC367260, <i>Homo sapiens</i> , Nepal, 2008, 99.4%, C1                      |
| VP2 | KC257092, <i>Camelus dromedaries</i> , Sudan, 2002                        | 2047 (2017-2102) - 733 (661-754)    | RDP 2.53E-16<br>GENECONV 4.72E-06<br>BootScan 7.95E-23<br>MaxChi 2.68E-13<br>Chimera 8.40E-12<br>SiScan 8.51E-11<br>3Seq 9.20E-08  | Unknown, closest = DQ480724, <i>Homo sapiens</i> , Iran, unknown, C2 | FJ347123, <i>Lama guanicoe</i> , Argentina, 1998, 99.9%, C2                 |
| VP2 | KX632343, <i>Homo sapiens</i> , Uganda, 2013                              | 1962 (1932-1978) - 2133 (2099-2136) | RDP 1.44E-13<br>GENECONV 7.46E-10<br>MaxChi 3.26E-06<br>Chimera 4.13E-05<br>SiScan 1.49E-07<br>3Seq 1.96E-09                       | JN706477, <i>Homo sapiens</i> , Thailand, 2010, 93%, C1              | KX655439, <i>Homo sapiens</i> , Uganda, 2013, 97.7%, C2                     |
| VP2 | KJ627064, <i>Homo sapiens</i> , Paraguay, 2002                            | 2675 (2615-95) - 409 (370-449)      | RDP 7.01E-06<br>GENECONV 2.53E-03<br>BootScan 1.26E-04<br>MaxChi 4.49E-02<br>Chimera 3.89E-02<br>SiScan 1.20E-02<br>3Seq 9.21E-04  | KJ752074, <i>Homo sapiens</i> , South Africa, 2005, 98.5%, C1        | KJ752859, <i>Homo sapiens</i> , Zimbabwe, 2011, 100%, C1                    |
| VP3 | KJ412679, <i>Homo sapiens</i> , Paraguay, 2009                            | 1 (2497-3) - 1068 (1047-1080)       | RDP 1.04E-72<br>GENECONV 1.11E-59<br>BootScan 1.41E-73<br>MaxChi 3.58E-31<br>Chimera 5.31E-31<br>SiScan 6.77E-38<br>3Seq 2.83E-09  | JX185760, <i>Homo sapiens</i> , Italy, 2007, 97.8%, M1               | KJ412622, <i>Homo sapiens</i> , Paraguay, 2009, 99.9%, M3                   |

|     |                                                    |                                     |                                                                                                                                    |                                                               |                                                              |
|-----|----------------------------------------------------|-------------------------------------|------------------------------------------------------------------------------------------------------------------------------------|---------------------------------------------------------------|--------------------------------------------------------------|
| VP3 | KP007164, <i>Homo sapiens</i> , Philippines, 2012  | 968 (968-996) - 1753 (1727-1777)    | RDP 1.97E-38<br>GENECONV 2.93E-35<br>BootScan 2.16E-37<br>MaxChi 2.45E-16<br>Chimera 1.76E-15<br>SiScan 2.85E-19<br>3Seq 2.83E-19  | KY000551, <i>Homo sapiens</i> , Germany, 2016, 99.4%, M2      | KP882081, <i>Homo sapiens</i> , Bangladesh, 2007, 99.7%, M2  |
| VP3 | KX171542, <i>Homo sapiens</i> , South Korea, 2014  | 1465 (1432-1538) - 2482 (2461-59)   | RDP 1.40E-37<br>GENECONV 7.17E-32<br>BootScan 2.84E-35<br>MaxChi 2.03E-19<br>Chimera 3.57E-19<br>SiScan 3.27E-23<br>3Seq 2.83E-09  | KJ752827, <i>Homo sapiens</i> , South Africa, 2003, 98.8%, M2 | KX171538, <i>Homo sapiens</i> , South Korea, 2012, 99.7%, M2 |
| VP3 | KX171543, <i>Homo sapiens</i> , South Korea, 2014  | 1650 (1607-1688) - 2472 (2455-59)   | RDP 5.19E-37<br>GENECONV 2.46E-33<br>BootScan 2.81E-34<br>MaxChi 1.95E-17<br>Chimera 1.05E-17<br>SiScan 1.55E-19<br>3Seq 2.83E-09  | KU248374, <i>Homo sapiens</i> , Bangladesh, 2010, 99.1%, M2   | KC443523, <i>Homo sapiens</i> , Australia, 2007, 99.6%, M2   |
| VP3 | AB779630, <i>Sus scrofa</i> , Thailand, 2008       | 1590 (1578-1645) - 90 (2490-96)     | RDP 3.19E-33<br>GENECONV 1.69E-25<br>BootScan 2.39E-31<br>MaxChi 2.05E-16<br>Chimera 3.42E-15<br>SiScan 9.38E-25<br>3Seq 1.42E-24  | MG781054, <i>Sus scrofa</i> , 2010-2011, Thailand, 92.7%, M1  | AB779632, <i>Sus scrofa</i> , Thailand, 2009, 99.9%, M1      |
| VP3 | MG181592, <i>Homo sapiens</i> , Malawi, 2013       | 2334 (2318-2349) - 196 (150-204)    | RDP 1.09E-32<br>GENECONV 6.85E-18<br>BootScan 5.72E-27<br>MaxChi 6.16E-12<br>Chimera 9.20E-12<br>SiScan 3.92E-10<br>3Seq 3.54E-27  | KC442894, <i>Homo sapiens</i> , USA, 2008, 96.4%, M2          | KT919912, <i>Homo sapiens</i> , USA, 2013, 99%, M1           |
| VP3 | JN013991, <i>Homo sapiens</i> , South Africa, 2008 | 82 (2550-99) - 260 (253-268)        | RDP 1.69E-29<br>GENECONV 8.98 E-27<br>BootScan 1.24E-17<br>MaxChi 9.47E-06<br>Chimera 1.58E-05<br>SiScan 1.76E-02<br>3Seq 5.67E-09 | KJ752816, <i>Homo sapiens</i> , South Africa, 2011, 97.4%, M1 | KP883027, <i>Homo sapiens</i> , Mali, 2008, 99.4%, M2        |
| VP3 | KU356576, <i>Homo sapiens</i> , Bangladesh, 2010   | 844 (815-855) - 1194 (1142-1219)    | RDP 4.55E-24<br>GENECONV 1.69E-21<br>BootScan 3.82E-20<br>MaxChi 1.89E-09<br>Chimera 1.77E-09<br>SiSeq 1.18E-07<br>3Seq 2.83E-09   | KC178787, <i>Homo sapiens</i> , Italy, 2008, 97.4%, M2        | KP882081, <i>Homo sapiens</i> , Bangladesh, 2007, 100%, M2   |
| VP3 | JQ0692727, <i>Homo sapiens</i> , Canada, 2007      | 51 (2482-59) - 845 (817-932)        | RDP 4.27E-23<br>GENECONV 9.70E-19<br>BootScan 6.96E-18<br>MaxChi 8.76E-14<br>Chimera 4.71E-14<br>SiScan 2.58E-17<br>3Seq 3.98E-35  | JQ069748, <i>Homo sapiens</i> , Canada, 2008, 99.1%, M1       | JQ069762, <i>Homo sapiens</i> , Canada, 2008, 99.7%, M1      |
| VP3 | JQ069754, <i>Homo sapiens</i> , Canada, 2008       | 835 (811-879) - 1621 (1591-1631)    | RDP 6.24E-20<br>GENECONV 4.13E-17<br>BootScan 4.05E-17<br>MaxChi 1.69E-09<br>Chimera 1.31E-09<br>SiScan 1.91E-10<br>3Seq 1.71E-27  | KJ627117, <i>Homo sapiens</i> , Paraguay, 1999, 99%, M1       | KP645258, <i>Homo sapiens</i> , Australia, 2010, 99.7%, M1   |
| VP3 | MG181592, <i>Homo sapiens</i> , Malawi, 2013       | 1736 (1712-1755) - 1941 (1889-1953) | RDP 2.97E-19<br>GENECONV 7.80E-18<br>BootScan 5.65E-15<br>MaxChi 5.47E-04<br>Chimera 5.27E-04<br>SiSeq 9.43E-07<br>3Seq 2.83E-09   | KC178787, <i>Homo sapiens</i> , Italy, 2008, 97%, M2          | LC374087, <i>Homo sapiens</i> , Nepal, 2009, 100%, M1        |

|     |                                                    |                                              |                                                                                                                                   |                                                                 |                                                                                        |
|-----|----------------------------------------------------|----------------------------------------------|-----------------------------------------------------------------------------------------------------------------------------------|-----------------------------------------------------------------|----------------------------------------------------------------------------------------|
| VP3 | KJ753665, <i>Homo sapiens</i> , South Africa, 2004 | 2158 (2127-2201) - 2517 (2447-64)            | Flagged in 107, KA p-value= 2.23E-18, Global p-value 5.69E-11                                                                     | KJ753481, <i>Homo sapiens</i> , Ethiopia, 2012, 94.9%, M1       | KY055418, <i>Sus scrofa</i> , Uganda, 2016, 98.6%, M1                                  |
| VP3 | AB374145, <i>Bos taurus</i> , Japan, Unknown       | 810 (765-875) - 1544 (1486-1639)             | RDP 1.85E-08<br>GENECONV 1.83E-04<br>BootScan 3.64E-05<br>MaxChi 1.68E-06<br>Chimera 3.72E-06<br>SiScan 2.14E-07<br>3Seq 4.41E-10 | LC340015, <i>Homo sapiens</i> , Japan, 2014, 95.5%, M2          | KJ411434, <i>Homo sapiens</i> , USA, 2012, 97.4%, M2                                   |
| VP3 | KJ753665, <i>Homo sapiens</i> , South Africa, 2004 | 1212 (1140-1312) - 1732 (1632-1801)          | RDP 3.84E-07<br>GENECONV 3.50E-05<br>BootScan 1.92E-05<br>MaxChi 2.67E-05<br>Chimera 1.59E-05<br>SiScan 3.24E-09<br>3Seq 2.08E-04 | HQ392255, <i>Homo sapiens</i> , Belgium, 2008, 96.2%, M1        | KX778614, <i>Homo sapiens</i> , Dominican Republic of the Congo, 2013, 99.4%, M1       |
| VP3 | KJ753665, <i>Homo sapiens</i> , South Africa, 2004 | 580 (498-612) - 922 (831-964)                | GENECONV 7.32E-11<br>BootScan 1.64E-09<br>MaxChi 3.90E-05<br>Chimera 3.85E-06<br>SiScan 9.81E-09<br>3Seq 7.82E-20                 | KP752825, <i>Homo sapiens</i> , South Africa, 2002, 99.6%, M1   | JQ069760, <i>Homo sapiens</i> , Canada, 2008, 99.7%, M1                                |
| VP3 | KX655453, <i>Homo sapiens</i> , Uganda, 2013       | 1258 (872-1389) - 1798 (1662-1917)           | Flagged in 551 sequences, Global p-value= 1.78E-12                                                                                | KP882576, <i>Homo sapiens</i> , Ghana, 2009, 94.9%, M2          | KU714446, <i>Homo sapiens</i> , Malawi, 2000, 96.7%, M2                                |
| VP4 | KX655509, <i>Homo sapiens</i> , Uganda, 2013       | 321 (308-323) - 683 (616-634)<br>VP8* domain | RDP 2.16E-54<br>GENECONV 1.17E052<br>BootScan 1.59E-51<br>MaxChi 7.47E-19<br>Chimera 1.44E-18<br>SiScan 8.23E-23<br>3Seq 2.07E-09 | KP902549, <i>Homo sapiens</i> , South Africa, 2003, 99.3%, P8   | KJ52687, <i>Homo sapiens</i> , South Africa, 2000, 99.3%, P8                           |
| VP4 | KX655487, <i>Homo sapiens</i> , Uganda, 2013       | 334(326-347) - 682(670-698)<br>VP8* domain   | RDP 1.06E-55<br>GENECONV 5.94E-51<br>BootScan 1.77E-50<br>MaxChi 4.55E-19<br>Chimera 5.96E-19<br>SiScan 1.60E-17<br>3Seq 2.07E-09 | KX646644, <i>Homo sapiens</i> , India, 2012, 96.6%, P6          | MG181340, <i>Homo sapiens</i> , Malawi, 2002, 99.7%, P8                                |
| VP4 | MG181725, <i>Homo sapiens</i> , Malawi, 2014       | 374 (367-382) - 542 (526-553)<br>VP8* domain | GENECONV 5.45E-46<br>BootScan 2.45E-41<br>MaxChi 4.02E-11<br>Chimera 3.97E-11<br>SiScan 2.83E-13<br>3Seq 2.07E-09                 | MG181758, <i>Homo sapiens</i> , Malawi, 2014, 99.2%, P8         | MG181890, <i>Homo sapiens</i> , Malawi, 2012, 100%, P4                                 |
| VP4 | KU714447, <i>Homo sapiens</i> , Malawi, 2000       | 1380 (1378-1381) - 1562 (1543-1571)          | RDP 1.47E-39<br>GENECONV 4.07E-38<br>BootScan 104E-29<br>MaxChi 1.24E-07<br>Chimera 3.25E-07<br>SiScan 7.45E-12<br>3Seq 4.14E-09  | GQ869840, <i>Homo sapiens</i> , Malawi, 2000, P8                | KU714458, <i>Homo sapiens</i> , Malawi, 2000, 99.5%, P14                               |
| VP4 | KX655441, <i>Homo sapiens</i> , Uganda, 2013       | 374 (357-382)-484 (475-488)<br>VP8* domain   | RDP 5.41E-34<br>GENECONV 1.32E-31<br>BootScan 2.38E-30<br>MaxChi 1.11E-05<br>Chimera 6.90E-06<br>SiScan 4.86E-10<br>3Seq 2.07E-09 | LC260226, <i>Homo sapiens</i> , 2015-2016, Indonesia, 99.2%, P6 | JQ069692, <i>Homo sapiens</i> , Canada, 2009, 99.1%, P8                                |
| VP4 | MG181637, <i>Homo sapiens</i> , Malawi, 2013       | 350 (325-368) - 459 (464-466)<br>VP8* domain | GENECONV 5.13E-28<br>BootScan 5.75E-15<br>MaxChi 2.13E-04<br>Chimera 1.00E-04<br>SiScan 4.71E-05<br>3Seq 4.14E-09                 | MG181758, <i>Homo sapiens</i> , Malawi, 2014, 99.5%, P8         | KJ870892, <i>Homo sapiens</i> , Democratic Republic of the Congo, 2007-2010, 95.5%, P6 |
| VP4 | JQ069674, <i>Homo sapiens</i> , Canada, 2008       | 1568 (1541-1574) - 2329 (2251-101)           | RDP 1.59E-23<br>GENECONV 2.53E-21<br>BootScan 1.59E-23<br>MaxChi 2.96E-12<br>Chimera 2.13E-12<br>SiScan 7.86E-14                  | HQ392253, <i>Homo sapiens</i> , Belgium, 2008, 99.5%, P8        | HM773714, <i>Homo sapiens</i> , USA, 2008, 99.5%, P8                                   |

|     |                                                    |                                     |                                                                                                                                   |                                                               |                                                                   |
|-----|----------------------------------------------------|-------------------------------------|-----------------------------------------------------------------------------------------------------------------------------------|---------------------------------------------------------------|-------------------------------------------------------------------|
|     |                                                    |                                     | 3Seq 1.44E-35                                                                                                                     |                                                               |                                                                   |
| VP4 | KC579762, <i>Homo sapiens</i> , USA, 1991          | 1073 (1039-1124) - 2332 (2269-8)    | RDP 4.67E-23<br>GENECONV 4.72E-17<br>BootScan 8.46E-23<br>MaxChi 1.99E-14<br>Chimera 1.76E-11<br>SiScan 7.07E-25<br>3Seq 4.04E-40 | HQ392253, <i>Homo sapiens</i> , Belgium, 2008, 98.7%, P8      | FJ947895, <i>Homo sapiens</i> , USA, 1991, 99.9%, P8              |
| VP4 | MG181659, <i>Homo sapiens</i> , Malawi, 2013       | 1116 (1064-1146) - 1462 (1402-1501) | RDP 6.53E-11<br>GENECONV 2.20E-09<br>BootScan 1.08E-09<br>MaxChi 1.781E-05<br>Chimera 1.74E-05<br>SiScan 5.94E-06                 | MG181725, <i>Homo sapiens</i> , Malawi, 2013, 98.1%, P8       | KJ752208, <i>Homo sapiens</i> , South Africa, 2012, 98.3%, P4     |
| VP4 | JF490554, <i>Homo sapiens</i> , Australia, 2005    | 462 (397-482) - 683 (637-722)       | RDP 2.17E-10<br>GENECONV 8.75E-09<br>BootScan 1.89E-10<br>MaxChi 3.26E-04<br>Chimera 1.04E-03<br>SiScan 1.14E-04<br>3Seq 4.14E-09 | KJ751716, <i>Homo sapiens</i> , Gambia, 2010, 98.4%, P8       | JQ069674, <i>Homo sapiens</i> , Canada, 2008, 99.5%, P8           |
| VP4 | AB008291, <i>Homo sapiens</i> , 1995               | 2291 (2223-71) - 807 (762-849)      | RDP 1.02E-03<br>BootScan 4.42E-02<br>MaxChi 5.00E-05<br>Chimera 1.32E-04<br>SiScan 1.51E-05<br>3Seq 1.66E-08                      | AB039939, <i>Homo sapiens</i> , Japan, 1990, 98.6%, P8        | AB008277, <i>Homo sapiens</i> , China, 1992, 98.9%, P8            |
| VP6 | KJ482497, <i>Sus scrofa</i> , Brazil, 2013         | 589 (584-605) - 801 (790 - 809)     | RDP 1.81E-25<br>GENECOV 7.17E-23<br>Bootscan 7.09E018<br>MaxChi 2.98E-10<br>SiScan 2.41E-11<br>3Seq 1.41E-09                      | DQ119822, <i>Sus scrofa</i> , China, unknown, 98.1%, I2       | KJ482491, <i>Sus scrofa</i> , Brazil, 2013, 100%, I5              |
| VP6 | KX632346, <i>Homo sapiens</i> , Uganda, 2013       | 1269 (1250-1272) - 56 (1333-103)    | RDP 7.77E-19<br>GENECONV 1.33E-17<br>Bootscan 7.27E-09<br>MaxChi 2.1E-02<br>Chimera 3.24E-03<br>SiScan 1.02E-07<br>3Seq 3.06E-11  | KU714448, <i>Homo sapiens</i> , Malawi, 2000, 92.7%, I1       | KX655455, <i>Homo sapiens</i> , Uganda, 2013, 96.5%, I2           |
| VP6 | JN014005, <i>Homo sapiens</i> , South Africa, 2008 | 160 (33-220 - 384 (379-451)         | RDP 1.98E-18<br>GENECONV 6.96E-18<br>BootScan 4.63E-16<br>MaxChi 1.00E-06<br>Chimera 2.77E-07<br>3Seq 1.41E-09                    | JN706549, <i>Homo sapiens</i> , Thailand, 2010, 97.8%, I1     | KJ752622, <i>Homo sapiens</i> , Senegal, 2009, 96.4%, I2          |
| VP6 | JX040423, <i>Homo sapiens</i> , India, 2009        | 1177(1143-1181) - 160(140-176)      | RDP 1.30E-15<br>GENECONV 4.97E-09<br>BootScan 1.95E-11<br>MaxChi 4.38E-11<br>Chimera 9.18E-12<br>SiScan 7.20E-15<br>3Seq 2.82E-09 | KF740531, <i>Homo sapiens</i> , India, 2009, I12              | Unknown, closest = KC579918, <i>Homo sapiens</i> , USA, 1976), I1 |
| VP6 | JN014003, <i>Homo sapiens</i> , South Africa, 2008 | 202 (1333-208) - 384(354-421)       | RDP 6.30E-15<br>GENECONV 2.39E-15<br>BootScan 1.04E-12<br>MaxChi 3.76E-05<br>Chimera 3.02E-05<br>SiScan 4.51E-05<br>3Seq 1.41E-09 | KP752725, <i>Homo sapiens</i> , Swaziland, 2010, 95.5%, I2    | JX027952, <i>Homo sapiens</i> , Australia, 2010, 96.7%, I1        |
| VP6 | KU714448, <i>Homo sapiens</i> , Malawi, 2000       | 653(635- 664) - 831(818-846)        | RDP 1.24E-12<br>GENECONV 7.55E-10<br>BootScan 5.50E-07<br>MaxChi 1.15E-05<br>Chimera 3.38E-05<br>SiScan 1.38E-04<br>3Seq 1.41E-09 | JN014005, <i>Homo sapiens</i> , South Africa, 2008, 95.9%, I1 | KX655455, <i>Homo sapiens</i> , Uganda, 2013, 99.4%, I2           |
| VP6 | KU714448, <i>Homo sapiens</i> , Malawi, 2000       | 317 (290-333) - 491 (474-507)       | RDP 3.94E-15<br>GENECONV 9.37E-14<br>BootScan 2.42E-13<br>MaxChi 2.80E<br>Chimera 2.58E-05                                        | KX638567, <i>Homo sapiens</i> , India, 2010, 96.6%, I1        | GU984758, <i>Bos taurus</i> , India, 2007, 98.9%, I2              |

|     |                                                                                        |                                  |                                                                                                                                   |                                                                  |                                                               |
|-----|----------------------------------------------------------------------------------------|----------------------------------|-----------------------------------------------------------------------------------------------------------------------------------|------------------------------------------------------------------|---------------------------------------------------------------|
|     |                                                                                        |                                  | SiScan 1.73E-07<br>3Seq 1.41E-09                                                                                                  |                                                                  |                                                               |
| VP6 | HQ11009, <i>Homo sapiens</i> , Belgium, 2007, 98.5%                                    | 754 (697-775) - 1357 (1329-32)   | GENECONV 2.23E-05<br>BootScan 1.61E-03<br>MaxChi 3.32E-11<br>Chimera 1.08E-10<br>SiScan 5.16E-14<br>3Seq 2.54E-19                 | MF469405, <i>Homo sapiens</i> , USA, 2015, 99.3%, I1             | HQ392161, <i>Homo sapiens</i> , Belgium, 2007, 98.5%, I1      |
| VP6 | FJ685614, <i>Homo sapiens</i> , India, 1992                                            | 698(672-712) - 1357 (1231-70)    | RDP 1.72E-08<br>GENECONV 1.61E-07<br>BootScan 2.85E-08<br>MaxChi 1.40E-09<br>Chimera 2.14E-09<br>SiScan 4.04E-11<br>3Seq 1.54E-23 | KX638599, <i>Homo sapiens</i> , India, 2010, 99.4%, I1           | KX632291, <i>Homo sapiens</i> , Uganda, 2013, 99.1%, I1       |
| VP6 | KJ753780, <i>Homo sapiens</i> , South Africa, 2004                                     | 513 (463-560) - 1008 (952-1031)  | GENECONV 1.89E-05<br>BootScan 2.60E-05<br>MaxChi 9.01E-09<br>Chimera 1.46E-08<br>SiScan 1.38E-09<br>3Seq 1.30E-19                 | JN258839, <i>Homo sapiens</i> , Belgium, 2001, 99.6%, I1         | LC056797, <i>Homo sapiens</i> , Vietnam, 2007, 98.8%, I1      |
| VP6 | HM988972, <i>Bos taurus</i> , South Korea, Unknown                                     | 751 (340-811) - 1113 (1080-1132) | RDP 2.08E-08<br>GENECONV 1.92E-08<br>BootScan 2.91E-08<br>MaxChi 1.45E-05<br>Chimera 2.41E-05<br>SiScan 3.56E-05<br>3Seq 5.55E-05 | Unknown, closest = MH238302, <i>Sus scrofa</i> , Spain, 2017, I5 | MH423866, <i>Sus scrofa</i> , China, 2016, 99.4%, I5          |
| VP7 | AB158431, <i>Bos taurus</i> , Japan, 2000                                              | 901 (868-907)- 1051 (1037-80)    | RDP 3.71E-16<br>GENECONV 1.25E-13<br>MaxChi 6.99E-07<br>Chimera 3.69E-05<br>SiScan 8.07E-10<br>3Seq 4.95E-10                      | AB077053, <i>Bos taurus</i> , Japan, 1995-1996, 95.9%, G8        | U50332, <i>Bos taurus</i> , USA, 1991, 97.2%, G6              |
| VP7 | HM591496, <i>Bos taurus</i> , India, 2009<br>KF170899, <i>Bos taurus</i> , India, 2012 | 1048 (1032-128) - 481 (448-506)  | RDP 2.78E-05<br>GENECONV 4.77 E-04<br>BootScan 4.86E-04<br>MaxChi 1.02E-03<br>Chimera 3.78E-05<br>SiSeq 7.21E-09<br>3Seq 3.90E-08 | EF199501, <i>Bos taurus</i> , India, 2001-2005, 96.6%, G6        | JX442784, <i>Bos taurus</i> , India, 2010, 100%, G6           |
| VP7 | D86274, <i>Homo sapiens</i> , 1990                                                     | 353 (338-368) - 745 (730-756)    | RDP 1.73E-18<br>GENECONV 1.43E-16<br>BootScan 2.50E-14<br>MaxChi 3.26E-13<br>Chimera 6.54E-13<br>SiScan 2.47E-10<br>3Seq 3.55E-33 | D86282, <i>Homo sapiens</i> , Japan, 1981, 98.7%, G3             | KF636217, <i>Homo sapiens</i> , South Africa, 2010, 94.9%, G1 |
| VP7 | MG181727, <i>Homo sapiens</i> , Malawi, 2014                                           | 316 (1010-314) - 470 (437-476)   | RDP 3.69E-17<br>GENECONV 1.84E-16<br>BootScan 8.96E-12<br>MaxChi 2.23E-08<br>Chimera 3.80E-08<br>SiScan 2.65E-12<br>3Seq 2.69E-23 | JQ069508, <i>Homo sapiens</i> , Canada, 2008, 98%, G1            | KJ753362, <i>Homo sapiens</i> , South Africa, 2003, 98.7%, G2 |
| VP7 | KX655511, <i>Homo sapiens</i> , Uganda, 2013                                           | 840 (823-851)- 1052 (1037-79)    | RDP 1.20E-16<br>GENECONV 3.11E-15<br>BootScan 2.21E-16<br>MaxChi 6.12E-05<br>Chimera 6.98E-06<br>SiScan 2.52E-04<br>3Seq 3.36E-09 | EU839936, <i>Homo sapiens</i> , Bangladesh, 2005, 97.4%, G9      | KX655456, <i>Homo sapiens</i> , Uganda, 2013, 100%, G8        |
| VP7 | KJ753024, <i>Homo sapiens</i> , South Africa, 2009                                     | 1013 (985-59) - 130(121-143)     | RDP 1.53E-16<br>GENECONV 2.32E-14<br>BootScan 1.27E-10<br>MaxChi 9.65E-04<br>Chimera 5.96E-04<br>SiScan 8.42E-13<br>3Seq 2.38E-16 | KM008672, <i>Homo sapiens</i> , India, 2010, 97.8%, G12          | D16344, <i>Homo sapiens</i> , Japan, 1977, G1                 |
| VP7 | KJ751729, <i>Homo sapiens</i> , Ethiopia, 2010                                         | 857 (833-859) - 1019 (991-51)    | RDP 4.0E-15<br>GENECONV 1.60E-10<br>BootScan 1.21EE-11                                                                            | KJ560447, <i>Homo sapiens</i> , USA, 2011, 99%, G3               | KP882703, <i>Homo sapiens</i> , Kenya, 2009, 99.3%, G1        |

|     |                                                                                           |                                  |                                                                                                                                          |                                                              |                                                              |
|-----|-------------------------------------------------------------------------------------------|----------------------------------|------------------------------------------------------------------------------------------------------------------------------------------|--------------------------------------------------------------|--------------------------------------------------------------|
|     | KP752817, <i>Homo sapiens</i> , Togo, 2010                                                |                                  | MaxChi 1.12E-03<br>Chimera 6.78E-04<br>SiScan 1.73E-03<br>3Seq 1.34E-05                                                                  |                                                              |                                                              |
| VP7 | MG181661, <i>Homo sapiens</i> , Malawi, 2013                                              | 590 (582-616) - 175 (170-181)    | RDP 7.82E-30<br>GENECONV 7.33E-23<br>BootScan 5.06E-31<br>MaxChi 3.49E-21<br>Chimera 1.06E-25<br>3Seq 2.28E-47                           | JQ069502, <i>Homo sapiens</i> , Canada, 2008, 96.6%, G1      | MG181859, <i>Homo sapiens</i> , Malawi, 2012, 99.5%, G2      |
| VP7 | KF170899, <i>Bos taurus</i> , India, 2010                                                 | (71) - (448-506)                 | RDP 2.78 E-05<br>GENECONV 4.77 E-04<br>BootScan 4.86 E-04<br>MaxChi 1.02 E-03<br>Chimera 3.78 E-05<br>SiScan 7.21 E-09<br>3Seq 3.90 E-08 | EF199501, <i>Bos taurus</i> , India, 2001-2005, 97.3%, G6    | JX442784, <i>Bos taurus</i> , India, 2010, 99.5%, G6         |
| VP7 | KJ412857, <i>Homo sapiens</i> , Paraguay, 2009                                            | 772 (754-779) - 1014(988-51)     | GENECONV 1.23E-19<br>BootScan 6.33E-20<br>MaxChi 2.56E-07<br>Chimera 4.38E-07<br>SiScan 2.01E-09<br>3Seq 3.36E-09                        | KJ412858, <i>Homo sapiens</i> , Paraguay, 2009, 100%, G3     | KJ412802, <i>Homo sapiens</i> , Paraguay, 2009, 99.2%, G1    |
| VP7 | KC443034, <i>Homo sapiens</i> , USA, 2006<br>MG181727, <i>Homo sapiens</i> , Malawi, 2014 | 55 (994-60) - 291 (262-296)      | RDP 1.66 E-30<br>GENECONV 5.07E-26<br>BootScan 2.32E-24<br>MaxChi 1.03E32<br>Chimera 1.10E-17<br>3Seq 3.36E-09                           | GQ229044, <i>Homo sapiens</i> , India, 2005-2008, 97.4%, G2  | JX411970, <i>Homo sapiens</i> , India, 2011, 98.7%, G1       |
| VP7 | MG181771, <i>Homo sapiens</i> , Malawi, 2012                                              | 715 (707-722) - 950 (921-971)    | RDP 2.65E-29<br>GENECONV 6.45E-26<br>BootScan 5.84E-17<br>MaxChi 1.70E-11<br>Chimera 2.36E-11<br>SiScan 4.78E-11<br>3Seq 3.55E-09        | KU356667, <i>Homo sapiens</i> , Bangladesh, 2013, 94.9%, G2  | KP222809, <i>Homo sapiens</i> , Mozambique, 2011, 99.6%, G1  |
| VP7 | KP752498, <i>Homo sapiens</i> , Togo, 2009                                                | 618 (605-641) - 1018 (1000-1020) | RDP 1.47E-28<br>GENECONV 4.49E-23<br>BootScan 2.78E-14<br>MaxChi 2.05E-14<br>Chimera 7.10E-19<br>SiScan 6.78E-39                         | D86266, <i>Homo sapiens</i> , Japan, 1995, 95.7%, G3         | MG181661, <i>Homo sapiens</i> , Malawi, 2013, 98.8%, G1      |
| VP7 | AY261339, <i>Homo sapiens</i> , South Africa                                              | 783 (774-791) - 14(1044-18)      | RDP 3.82E-28<br>GENECONV 2.35E-25<br>BootScan 2.41E-27<br>MaxChi 5.44E-10<br>Chimera 2.33E-10<br>SiScan 3.15E-14<br>3Seq 3.36E-09        | GU567778, <i>Homo sapiens</i> , Russia, 2003-2009, 96.9%, G2 | JX458964, <i>Homo sapiens</i> , Argentina, 2001, 100%, G1    |
| VP7 | KX655489, <i>Homo sapiens</i> , Uganda, 2013                                              | 151 (132-155) - 316 (311-325)    | RDP 2.14E-27<br>GENECONV 1.27E024<br>BootScan 3.15E-19<br>MaxChi 7.75E-09<br>Chimera 7.42E-09<br>SiScan 8.44E-20<br>3Seq 4.13E-03        | DQ146676, <i>Homo sapiens</i> , Bangladesh, 2003, 98.1%, G12 | JN232074, <i>Homo sapiens</i> , Brazil, 2004, 99.4%, G1      |
| VP7 | D86273, <i>Homo sapiens</i> , 1986                                                        | 347 (339-353) - 726 (697-763)    | RDP 1.70E-24<br>GENECONV 1.57E-22<br>BootScan 1.26E-17<br>MaxChi 7.23E-14<br>Chimera 1.37E-15<br>SiScan 1.73E-13<br>3Seq 6.15E-47        | AF450293, <i>Homo sapiens</i> , China, Unknown, 97.4%, G3    | D50121, <i>Homo sapiens</i> , 96.3%, Japan, 1992-1993, G2    |
| VP7 | KJ4122858, <i>Homo sapiens</i> , Paraguay, 2009                                           | 881 (859-914) - 1016 (991-54)    | RDP 4.80E-14<br>GENECONV 3.04E-13<br>BootScan 3.81E-13<br>MaxChi 5.36E-03<br>Chimera 1.05E-02                                            | AB585923, <i>Homo sapiens</i> , Hong Kong, 2006, 98.5%, G3   | HQ425288, <i>Homo sapiens</i> , South Korea, 2004, 99.2%, G4 |



|      |                                                                                                                                                            |                                 |                                                                                                                                   |                                                                |                                                               |
|------|------------------------------------------------------------------------------------------------------------------------------------------------------------|---------------------------------|-----------------------------------------------------------------------------------------------------------------------------------|----------------------------------------------------------------|---------------------------------------------------------------|
|      |                                                                                                                                                            |                                 | SiScan 1.36E-04<br>3Seq 3.36E-09                                                                                                  |                                                                |                                                               |
| VP7  | KU714449, <i>Homo sapiens</i> , Malawi, 2000                                                                                                               | 825 (795-835) - 93 (85-93)      | RDP 1.04E-13<br>GENECONV 4.64E-09<br>BootScan 1.71E-09<br>MaxChi 1.20E-10<br>Chimera 9.96E-11<br>SiScan 3.89E-10<br>3Seq 7.72E-08 | KM008635, <i>Homo sapiens</i> , India, 2009, 92.5%, G1         | KU714460, <i>Homo sapiens</i> , Malawi, 2000, 98.2%, G6       |
| VP7  | KJ412888, <i>Homo sapiens</i> , Paraguay, 2009                                                                                                             | 873 (823-890) - 1023 (1000-81)  | RDP 2.17E-12<br>GENECONV 7.16E-11<br>BootScan 3.63E-12<br>MaxChi 5.48E-04<br>Chimera 4.30E-04<br>SiScan 8.10E-03<br>3Seq 1.12E-05 | D86275, <i>Homo sapiens</i> , China, 1986, 88%, G3             | JF490143, <i>Homo sapiens</i> , Australia, 2004, 99.3%, G1    |
| VP7  | KX655445, <i>Homo sapiens</i> , Uganda, 2013                                                                                                               | 1042 (1006-110) - 274 (269-287) | RDP 6.32E-12<br>GENECONV 5.98E-10<br>BootScan 8.41E-08<br>MaxChi 2.20E-06<br>Chimera 3.68E-08<br>SiScan 3.20E-04<br>3Seq 8.29E-11 | KJ560447, <i>Homo sapiens</i> , USA, 2011, 95.8%, G3           | KJ753326, <i>Homo sapiens</i> , Kenya, unknown, 94.9%, G8     |
| VP7  | D86277, <i>Homo sapiens</i> , China, 1989                                                                                                                  | 335 (323-353)- 754 (710-762)    | RDP 8.20E-20<br>GENECONV 2.21E-15<br>BootScan 1.81E-10<br>MaxChi 1.91E-12<br>Chimera 1.95E-13<br>SiScan 3.36E-13<br>3Seq 7.22E-27 | D86279, <i>Homo sapiens</i> , China, 1992, 89.6%, G3           | KP883055, <i>Homo sapiens</i> , Mali, 2009, 95.7%, G2         |
| VP7  | AF281044, <i>Homo sapiens</i> , Ireland, 1997-1999<br>GQ433992, <i>Homo sapiens</i> , Ireland, Unknown                                                     | 362 (346-366) - 589 (558-605)   | RDP 1.32E-09<br>GENECONV 1.25E-02<br>BootScan 4.96E-05<br>MaxChi 2.75E-05<br>Chimera 1.50E-04<br>3Seq 3.36E-09                    | AY866503, <i>Homo sapiens</i> , Thailand, 1995-1997, 98.9%, G9 | KM008633, <i>Homo sapiens</i> , India, 2009, 89%, G1          |
| VP7  | KU714449, <i>Homo sapiens</i> , Malawi, 2000                                                                                                               | 440 (421-446) - 604(641-704)    | RDP 3.12E-10<br>GENECONV 7.36E-11<br>BootScan 1.56E-07<br>MaxChi 1.83E-03<br>Chimera 1.69E-03<br>3Seq 1.08E-12                    | JQ069503, <i>Homo sapiens</i> , Malawi, 2000, 100%, G1         | KU714460, <i>Homo sapiens</i> , Malawi, 2000, 100%, G6        |
| VP7  | KX655444, <i>Homo sapiens</i> , Uganda, 2013                                                                                                               | 110 (88-114) - 191(183-197)     | RDP 2.84E-08<br>GENECONV 3.00E-05<br>MaxChi 3.11E-02<br>Chimera 3.11E-02<br>SiScan 1.01E-03<br>3Seq 8.25E-05                      | KC579965, <i>Homo sapiens</i> , USA, 1978, 96.2%, G3           | AF254137, <i>Homo sapiens</i> , Ireland, 1997-1999, 93.9%, G1 |
| NSP1 | KP753174, <i>Sus scrofa</i> , South Africa, 2008,<br>KJ753184, <i>Sus scrofa</i> , South Africa, 2008,<br>KP752951, <i>Sus scrofa</i> , South Africa, 2008 | 1498 (1435-25) - 585(573-596)   | RDP 7.45E-28<br>GENECONV 5.26E-27<br>BootScan 7.87E-25<br>MaxChi 8.49E-16<br>Chimera 5.73E-16<br>SiScan 9.95E-18<br>3Seq 1.09E-48 | KP752999, <i>Sus scrofa</i> , South Africa, 2009, 99.9%, A8    | KP753000, <i>Sus scrofa</i> , South Africa, 2009, 99.7%, A8   |
| NSP1 | KX655446, <i>Homo sapiens</i> , Uganda, 2013                                                                                                               | 485 (455-499)- 889 (868-914)    | RDP 3.98E-25<br>GENECONV 2.55E-22<br>BootScan 2.53E-21<br>MaxChi 1.96E-14<br>Chimera 8.97E-15<br>SiScan 1.22E-19<br>3Seq 3.18E-09 | LC406825, <i>Homo sapiens</i> , Kenya, 2012, 95.9%, A2         | MG181277, <i>Homo sapiens</i> , Malawi, 2000, 96.5%, A1       |
| NSP1 | DQ199658, <i>Homo sapiens</i> , Australia, 2001                                                                                                            | 485 (440-517) - 942 (931-956)   | RDP 2.25E-22<br>GENECONV 7.04E-20<br>BootScan 1.52E-21<br>MaxChi 2.09E-12<br>Chimera 1.10E-12<br>SiScan 6.14E-12<br>3Seq 2.61E-35 | KP883160, <i>Homo sapiens</i> , Malawi, 2008, 98.1%, A1        | DQ199657, <i>Homo sapiens</i> , Australia, 1997, 98.7%, A1    |
| NSP1 | KJ482257, <i>Sus scrofa</i> , Brazil, 2013                                                                                                                 | 1534 (1490-44) - 888 (853-909)  | RDP 3.24E-20<br>GENECONV 2.11E-19<br>BootScan 5.21E-10                                                                            | KJ482252, <i>Sus scrofa</i> , Brazil, 2013, 92.9%, A8          | KJ482255, <i>Sus scrofa</i> , Brazil, 2013, 99.9%, A8         |

|      |                                                                                                                                                    |                                  |                                                                                                                                   |                                                                   |                                                                        |
|------|----------------------------------------------------------------------------------------------------------------------------------------------------|----------------------------------|-----------------------------------------------------------------------------------------------------------------------------------|-------------------------------------------------------------------|------------------------------------------------------------------------|
|      |                                                                                                                                                    |                                  | MaxChi 9.52E-18<br>SiScan 2.81E-21<br>3Seq 1.81E-29                                                                               |                                                                   |                                                                        |
| NSP1 | KX778616, <i>Homo sapiens</i> , Dominican Republic, 2013                                                                                           | 1147 (1127-1155) - 1462 (1433-5) | RDP 1.14E-19<br>GENECONV 4.51E-17<br>BootScan 8.47E-16<br>MaxChi 1.54E-11<br>Chimera 1.93E-12<br>SiScan 9.28E-13<br>3Seq 3.18E-09 | KJ752290, <i>Homo sapiens</i> , Zambia, 2009, 96.3%, A1           | KX363351, <i>Sus scrofa</i> , Vietnam, 2012, 95.9%, A8                 |
| NSP1 | KJ482254, <i>Sus scrofa</i> , Brazil, 2013                                                                                                         | 534 (499-559) - 886 (849-911)    | RDP 7.72E-18<br>GENECONV 1.84E-16<br>BootScan 3.89E-14<br>MaxChi 2.53E-10<br>Chimera 2.27E-10<br>SiScan 1.55E-08<br>3Seq 8.01E-16 | KJ482247, <i>Sus scrofa</i> , Brazil, 2013, 100%, A8              | KJ482256, <i>Sus scrofa</i> , Brazil, 2013, 100%, A8                   |
| NSP1 | KX632348, <i>Homo sapiens</i> , Uganda, 2013                                                                                                       | 580 (508-605) - 844 (829-874)    | RDP 1.91E-10<br>GENECONV 3.85E-10<br>BootScan 1.02E-06<br>MaxChi 2.32E-04<br>Chimera 2.29E-04<br>SiScan 6.75E-08<br>3Seq 3.18E-09 | KP752785, <i>Homo sapiens</i> , Ethiopia, 2010, 94.9%, A1         | KP882434, <i>Homo sapiens</i> , Ghana, 2009, 92.8%, A2                 |
| NSP1 | KP752999, <i>Sus scrofa</i> , South Africa, 2009                                                                                                   | 1394 (1368-31) - 601 (552-631)   | RDP 1.38E-06<br>BootScan 5.20E-05<br>MaxChi 2.04E-08<br>Chimera 2.74E-08<br>SiScan 3.04E-06<br>3Seq 2.78E-12                      | KF835942, <i>Homo sapiens</i> , Hungary, 2005, 93.9%, A8          | Unknown, closest = KP753000 <i>Sus scrofa</i> , South Africa, 2009, A8 |
| NSP1 | JX040426, <i>Homo sapiens</i> , India, 2009                                                                                                        | 662 (559-677) - 842 (783-884)    | RDP 8.72E-03<br>GENECONV 1.35E-05<br>BootScan 4.19E-02<br>MaxChi 1.57E-04<br>Chimera 5.50E-05<br>SiScan 4.50E-03<br>3Seq 6.62E-07 | KU292525, <i>Homo sapiens</i> , India, 2014, 98.4%, A11           | KP882478, <i>Homo sapiens</i> , Ghana, 2008, 95%, A11                  |
| NSP1 | KP753000, <i>Sus scrofa</i> , South Africa, 2009                                                                                                   | 1389 (1359-41) - 602 (504-631)   | RDP 4.27E-03<br>BootScan 4.30E-03<br>MaxChi 1.12E-04<br>Chimera 1.52E-05<br>SiScan 3.90E-04<br>3Seq 5.58E-05                      | JQ309141, <i>Equus caballus</i> , United Kingdom, 1975, 87.2%, A8 | KF835942, <i>Homo sapiens</i> , Hungary, 2005, 92.8%, A8               |
| NSP1 | KJ482254, <i>Sus scrofa</i> , Brazil, 2013                                                                                                         | 1534 (1461-44) - 533 (499-909)   | GENECONV: 1.50E-13<br>BootScan: 5.96E-10<br>MaxChi: 3.77E-08<br>Chimera: 6.43E-08<br>SiScan: 1.88E-11<br>3Seq: 1.46 E-24          | KJ482247, <i>Sus scrofa</i> , Brazil, 2013, 99.1%, A8             | KJ482255, <i>Sus scrofa</i> , Brazil, 2013, 100%, A8                   |
| NSP2 | KJ753657, <i>Homo sapiens</i> , South Africa, 2004<br>KM026663, <i>Homo sapiens</i> , Brazil, 2009<br>KM026664, <i>Homo sapiens</i> , Brazil, 2009 | (0) - (219 -278)                 | RDP 2.01E-03<br>GENECONV 1.6E-04<br>BootScan 4.07E-06<br>MaxChi 3.51E-03<br>Chimera 3.30E-03<br>SiScan 1.90E-07<br>3Seq 1.57E-04  | KM026633, <i>Homo sapiens</i> , Brazil, 2003, 98.6%, N1           | KJ918915, <i>Homo sapiens</i> , Hungary, 2012, 99.5%, N1               |
| NSP2 | MF18783, <i>Homo sapiens</i> , USA, 2011                                                                                                           | 1015 (1002-57) - 286 (273-297)   | GENECONV 1.60E-14<br>BootScan 1.55E-14<br>MaxChi 6.46E-04<br>Chimera 3.74E-06<br>SiScan 4.37E-08<br>3Seq 5.75E-22                 | KJ752146, <i>Homo sapiens</i> , South Africa, 2011, 99.7%, N1     | KX655480, <i>Homo sapiens</i> , Uganda, 2012, 99.3%, N2                |
| NSP2 | MF18783, <i>Homo sapiens</i> , USA, 2011                                                                                                           | 1015 (1002-57) - 286 (273-297)   | GENECONV 1.60E-14<br>BootScan 1.55E-14<br>MaxChi 6.46E-04<br>Chimera 3.74E-06<br>SiScan 4.37E-08<br>3Seq 5.75E-22                 | KJ752146, <i>Homo sapiens</i> , South Africa, 2011, 99.7%, N1     | KX655480, <i>Homo sapiens</i> , Uganda, 2012, 99.3%, N2                |
| NSP2 | AB779641, <i>Sus scrofa</i> , Thailand, 2008                                                                                                       | 870 (833-921) - 216 (150-396)    | RDP 6.30E-05<br>GENECONV 4.67 E-03<br>BootScan 1.24 E-03                                                                          | KX363374, <i>Sus scrofa</i> , Vietnam, 2012, 96.5%, N1            | JF796719, <i>Sus scrofa</i> , South Korea, 2006, 100%, N1              |

|      |                                             |                               |                                                                                                                                           |                                                          |                                                                     |
|------|---------------------------------------------|-------------------------------|-------------------------------------------------------------------------------------------------------------------------------------------|----------------------------------------------------------|---------------------------------------------------------------------|
|      |                                             |                               | MaxChi 1.28 E-03<br>Chimaera 6.20 E-03<br>3Seq 1.48 E-05                                                                                  |                                                          |                                                                     |
| NSP4 | MF58092, <i>Homo sapiens</i> , China, 2013  | 599 (546-616) - (745-94)      | RDP 1.64 E-11<br>GENECONV 2.38 E-08<br>BootScan 1.14 E-09<br>MaxChi 1.01 E-09<br>Chimaera 4.58 E-10<br>SiScan 4.77 E-18<br>3Seq 6.43 E-21 | JF813107, <i>Homo sapiens</i> , China, 2008, 97.9%, E1   | MG781050, <i>Homo sapiens</i> , Thailand, 2011, 73.1%, E1           |
| NSP4 | AB361290, <i>Homo sapiens</i> , India, 2006 | 624 (548-635) - 726 (712-50)  | RDP 1.66 E-09<br>GENECONV 4.38 E-08<br>BootScan 6.96 E-07<br>MaxChi 1.96 E-03<br>Chimaera 2.49 E-05<br>3Seq 1.15 E-12                     | AB326338, <i>Homo sapiens</i> , India, 1989, 95.8%, E2   | Unknown, closest = FJ492834, <i>Sus scrofa</i> , Ireland, E9        |
| NSP4 | AB326966, <i>Homo sapiens</i> , India, 2001 | 605 (564-614) - 675 (670-46)  | RDP 2.77 E-09<br>GENECONV 1.10 E-10<br>BootScan 2.26 E-02<br>MaxChi 2.54 E-05<br>Chimaera 1.63 E-03<br>3Seq 8.89 E-09                     | FJ685615, <i>Homo sapiens</i> , India, 1992, 98.2%, E1   | Unknown, closest = MG181929, <i>Homo sapiens</i> , Malawi, 2012, E2 |
| NSP5 | M33608, <i>Homo sapiens</i> , 1993          | 619 (505-624) - 668 (665-182) | RDP 1.44 E-05<br>GENECONV 2.64 E-06<br>BootScan 4.1 E-05<br>MaxChi 4.54 E-02<br>Chimaera 3.70 E-02<br>SiScan 2.49 E-05<br>3Seq 6.61 E-04  | MG996138, <i>Homo sapiens</i> , Singapore, 2016, 95%, H2 | JQ358774, <i>Homo sapiens</i> , India, 2011, 100%, H3               |

903

904 **Supplementary Table 2.** Amino acid changes observed in segment 9 (VP7) recombination events

905 observed in more than one isolate. Changes occurring in predicted epitope regions are noted.

906

| Gene recombinant | Accession Number | Position | Major | Minor | Epitope region? |
|------------------|------------------|----------|-------|-------|-----------------|
| G6-G6            | KF170899         | 40       | M     | T     | -               |
|                  |                  | 46       | I     | T     | -               |
|                  |                  | 48       | V     | T     | -               |
|                  |                  | 116      | V     | I     | -               |
| G3-G1            | KJ751729         | 281      | V     | I     | Yes             |
|                  |                  | 303      | V     | I     | Yes             |
|                  |                  | 309      | A     | V     | Yes             |
|                  |                  | 318      | N     | D     |                 |
| G9-G1            | AF281044         | 135      | S     | C     | -               |
|                  |                  | 162      | D     | E     | -               |
|                  |                  | 163      | R     | W     | -               |
|                  |                  | 169      | V     | D     |                 |
|                  |                  | 170      | N     | I     |                 |
|                  |                  | 176      | L     | Q     |                 |
| G2-G1            | KC443034         | 180      | G     | E     | Yes             |
|                  |                  | 9        | I     | T     | -               |

|  |  |    |   |   |   |
|--|--|----|---|---|---|
|  |  | 10 | F | I | - |
|  |  | 21 | S | Y | - |
|  |  | 25 | T | S | - |
|  |  | 26 | I | V | - |
|  |  | 28 | N | R | - |
|  |  | 29 | P | I | - |
|  |  | 31 | A | D | - |
|  |  | 32 | P | Y | - |
|  |  | 35 | F | Y | - |
|  |  | 41 | I | F | - |
|  |  | 42 | A | V | - |
|  |  | 43 | L | A | - |
|  |  | 44 | M | L | - |
|  |  | 45 | S | F | - |
|  |  | 47 | F | L | - |
|  |  | 48 | G | T | - |
|  |  | 49 | R | K | - |
|  |  | 50 | T | A | - |
|  |  | 56 | Y | N | - |
|  |  | 65 | A | T | - |
|  |  | 68 | T | S | - |
|  |  | 72 | S | R | - |
|  |  | 73 | G | E | - |
|  |  | 75 | S | V | - |

907

908

909

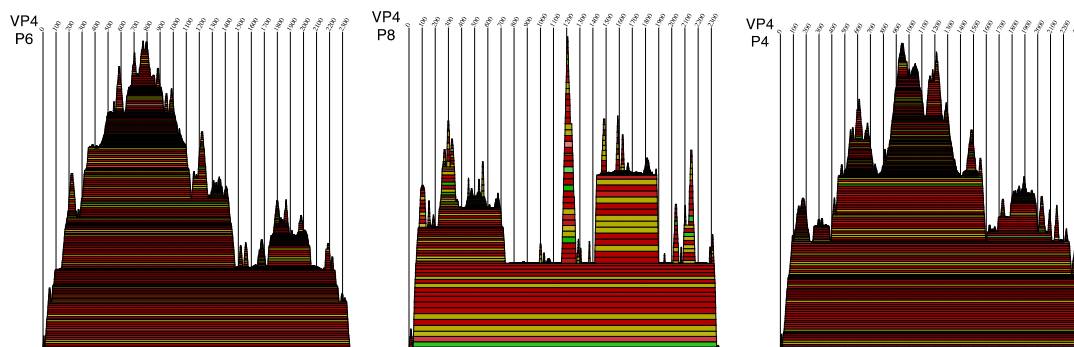

910

911 **Supplementary Figure 1.** P6, P8, and P4 consensus RNA secondary structure mountain plots. Mountain plots  
912 showing consensus secondary structure of VP4 genotypes P6, P8, and P4. Lighter colors indicate lower  
913 probabilities of base-pairing. Peaks correspond to hairpin-loops, plateaus to loops, and slopes to helices. Plot  
914 was generated using RNAalifold in the ViennaRNA package.

915

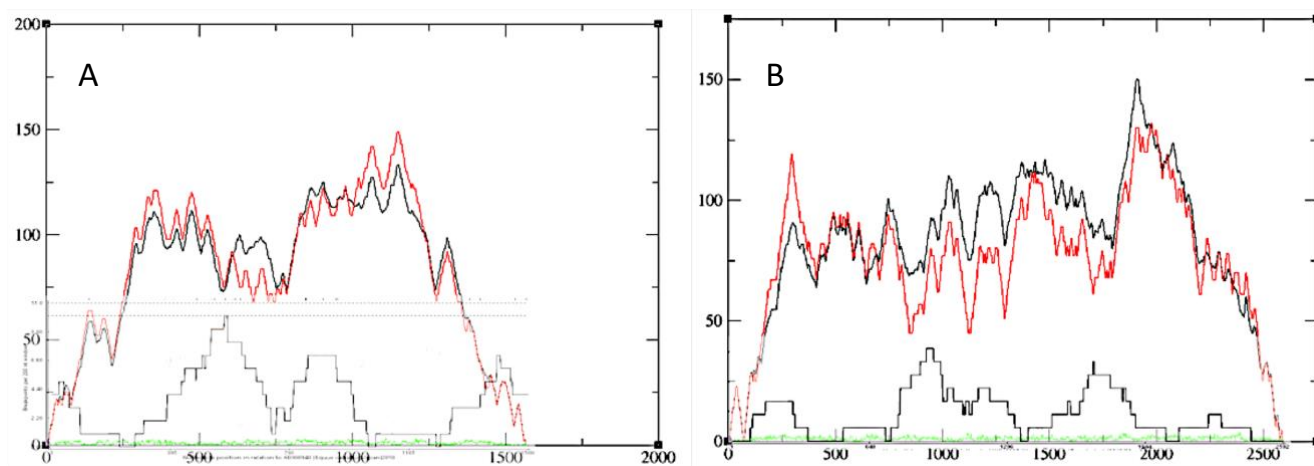

916

917 **Supplementary Figure 2.** Consensus mountain plots of A) NSP1 and B) VP3 with recombination breakpoint  
918 distribution plot in gray.
